# Supplementary material for: Macrophages orchestrate antiviral defense and epithelial repair in a human iPSC-derived alveolar air-liquid interface
Source: JCI journal article supplement (doi:10.1172/jci.insight.203042), 2026-03-17
Supplement: sd1 [file 1]

# SUPPLEMENTAL DATA

## Position-5-Driven Reorientation of an Immunodominant HLA-A\*24:02 SARS-CoV-2 Epitope Drives Universal T-cell Escape

Takeshi Nakama<sup>1†</sup>, Aaron Wall<sup>2†</sup>, Garry Dolton<sup>2†</sup>, Li-Rong Tan<sup>2</sup>, Hannah Thomas<sup>2</sup>, Hiroshi Hamana<sup>3</sup>, Yoshiki Aritsu<sup>1</sup>, Toong Seng Tan<sup>1</sup>, Mako Toyoda<sup>1</sup>, Yoshihiko Goto<sup>1</sup>, Huanyu Li<sup>1</sup>, Mizuki Kitamatsu<sup>4</sup>, Keiko Udaka<sup>5</sup>, Yusuke Miyashita<sup>6, 7</sup>, Hiroyuki Oshiumi<sup>6</sup>, Kimitoshi Nakamura<sup>7</sup>, Yoji Nagasaki<sup>8</sup>, Rumi Minami<sup>9</sup>, Hiroto Nakata<sup>10</sup>, Pierre J Rizkallah<sup>2</sup>, Hiroyuki Kishi<sup>3</sup>, Takamasa Ueno<sup>1</sup>, Andrew K. Sewell<sup>1,2‡\*</sup>, Chihiro Motozono<sup>1‡\*</sup>

<sup>1</sup> Division of Infection and Immunity, Joint Research Center for Human Retrovirus infection, Kumamoto University, Kumamoto 8600811, Japan

<sup>2</sup> Division of Infection and Immunity, Cardiff University School of Medicine, CF14 4XN Cardiff, Wales, UK

<sup>3</sup> Department of Immunology, Faculty of Medicine, Academic Assembly, University of Toyama, Toyama 9300194, Japan

<sup>4</sup> Department of Applied Chemistry, Faculty of Science and Engineering, Kindai University, Osaka 577-8502, Japan

<sup>5</sup> Department of Immunology, Kochi University, Kochi 7838505, Japan

<sup>6</sup> Department of Immunology, Graduate School of Medical Sciences, Faculty of Life Sciences, Kumamoto University, Kumamoto 8608556, Japan

<sup>7</sup> Department of Pediatrics, Graduate School of Medical Sciences, Kumamoto University, Kumamoto 8608556, Japan

<sup>8</sup> Division of Infectious Diseases, Clinical Research Institute, NHO, Kyushu Medical Center, Fukuoka 8108563, Japan

<sup>9</sup> Internal Medicine, Clinical Research Institute, NHO, Kyushu Medical Center, Fukuoka 8108563, Japan

<sup>10</sup> Department of Hematology, Rheumatology and Infectious Diseases, Kumamoto University School of Medicine, Kumamoto University Hospital, Kumamoto 8608556, Japan

Prepared by Andrew Sewell

April 22<sup>nd</sup>, 2026

### CONTENTS

**Supplemental Tables S1-S6**

**Supplemental Figures S1-S8**

**Table S1: Donor information related to Fig. 1, 2 and 7.**

| Donor ID | Sex    | Age | HLA-A24? | vaccinated? | Days after 2 <sup>nd</sup> vax | Blood collection |
|----------|--------|-----|----------|-------------|--------------------------------|------------------|
| VKU-1    | Male   | 48  | Positive | BNT162b2    | 35                             | 03/05/2021       |
| VKU-2    | Male   | 37  | Positive | BNT162b2    | 35                             | 03/05/2021       |
| VKU-3    | Male   | 40  | Positive | BNT162b2    | 35                             | 03/05/2021       |
| VKU-5    | Male   | 34  | Negative | BNT162b2    | 35                             | 03/05/2021       |
| VKU-7    | Male   | 55  | Positive | BNT162b2    | 31                             | 08/05/2021       |
| VKU-8    | Male   | 55  | Negative | BNT162b2    | 35                             | 08/05/2021       |
| VKU-10   | Female | 60  | Positive | BNT162b2    | 48                             | 03/05/2021       |
| VKU-11   | Female | 39  | Positive | BNT162b2    | 34                             | 25/05/2021       |
| VKU-16   | Male   | 54  | Negative | BNT162b2    | 35                             | 08/05/2021       |
| VKU-17   | Male   | 35  | Negative | BNT162b2    | 35                             | 25/05/2021       |
| VKU-18   | Female | 38  | Positive | BNT162b2    | 35                             | 25/05/2021       |
| VKU-19   | Female | 36  | Positive | BNT162b2    | 35                             | 27/05/2021       |
| VKU-20   | Male   | 33  | Negative | BNT162b2    | 34                             | 25/05/2021       |
| VKU-21   | Female | 27  | Negative | BNT162b2    | 34                             | 25/05/2021       |
| VKU-22   | Male   | 34  | Positive | BNT162b2    | 36                             | 27/05/2021       |
| VKU-23   | Male   | 54  | Positive | BNT162b2    | 49                             | 27/05/2021       |
| VKU-25   | Male   | 46  | Negative | BNT162b2    | 34                             | 25/05/2021       |
| VKU-27   | Male   | 43  | Negative | BNT162b2    | 35                             | 27/05/2021       |
| VKU-28   | Male   | 30  | Positive | BNT162b2    | 35                             | 10/06/2021       |
| VKU-41   | Male   | 34  | Negative | BNT162b2    | 35                             | 27/05/2021       |
| VKU-42   | Male   | 34  | Positive | BNT162b2    | 35                             | 27/05/2021       |
| VKU-43   | Male   | 38  | Negative | BNT162b2    | 35                             | 27/05/2021       |
| VKU-44   | Male   | 29  | Positive | BNT162b2    | 31                             | 25/05/2021       |
| VKU-45   | Male   | 27  | Negative | BNT162b2    | 35                             | 27/05/2021       |
| VKU-46   | Female | 40  | Negative | BNT162b2    | 35                             | 27/05/2021       |
| VKU-47   | Female | 57  | Negative | BNT162b2    | 31                             | 25/05/2021       |
| VKU-48   | Male   | 59  | Positive | BNT162b2    | 35                             | 27/05/2021       |
| GV9      | Female | 24  | Positive | BNT162b2    | 202                            | 27/12/2021       |
| GV12     | Female | 28  | Negative | BNT162b2    | 23                             | 01/07/2021       |
| GV15     | Female | 23  | Positive | BNT162b2    | 182                            | 06/01/2022       |
| GV16     | Male   | 22  | Positive | No          | NA                             | 17/05/2021       |
| GV16-1   | Male   | 22  | Positive | BNT162b2    | 202                            | 27/12/2021       |
| GV17     | Male   | 24  | Negative | BNT162b2    | 21                             | 29/06/2021       |
| GV19     | Male   | 24  | Positive | BNT162b2    | 202                            | 27/12/2021       |
| GV24     | Male   | 23  | Positive | BNT162b2    | 212                            | 06/01/2022       |
| GV25     | Male   | 24  | Negative | BNT162b2    | 22                             | 30/06/2021       |
| GV26     | Male   | 23  | Positive | BNT162b2    | 212                            | 06/01/2022       |
| GV27     | Female | 23  | Negative | BNT162b2    | 21                             | 29/06/2021       |
| GV32     | Male   | 56  | Positive | No          | NA                             | 11/05/2021       |
| GV32-1   | Male   | 56  | Positive | BNT162b2    | 27                             | 05/07/2021       |
| GV32-2   | Male   | 56  | Positive | BNT162b2    | 195                            | 20/12/2021       |
| GV33     | Male   | 39  | Positive | No          | NA                             | 11/05/2021       |
| GV33-1   | Male   | 39  | Positive | BNT162b2    | 24                             | 28/07/2021       |
| GV33-2   | Male   | 39  | Positive | BNT162b2    | 192                            | 20/12/2021       |
| GV34     | Female | 38  | Positive | BNT162b2    | 24                             | 05/07/2021       |
| GV35     | Male   | 52  | Positive | BNT162b2    | 24                             | 05/07/2021       |
| GV36     | Male   | 41  | Positive | BNT162b2    | 21                             | 05/07/2021       |
| GV36-1   | Male   | 41  | Positive | BNT162b2    | 192                            | 20/12/2021       |
| GV52     | Female | 67  | Positive | BNT162b2    | 21                             | 05/07/2021       |
| GV59     | Male   | 37  | Positive | BNT162b2    | 25                             | 15/09/2021       |
| GV59-1   | Male   | 37  | Positive | BNT162b2    | 126                            | 20/12/2021       |
| GV60     | Male   | 51  | Positive | mRNA-1273   | 116                            | 20/12/2021       |

**Table S2: Convalescent donor information related to Fig. 2 and 6.**

| Cohort                                | Donor ID      | Sex    | Age      | HLA-A24? | vaccinated? | COVID-19 severity | Days post PCR+ or onset | Blood collection |
|---------------------------------------|---------------|--------|----------|----------|-------------|-------------------|-------------------------|------------------|
| <b>A24+</b><br>COVID-19 convalescents | <b>KK-008</b> | Male   | 63       | Positive | No          | Mild              | 17                      | 19/08/2021       |
|                                       | <b>GV-38</b>  | Male   | 23       | Positive | No          | Mild              | 18                      | 20/05/2021       |
|                                       | <b>GV-41</b>  | Male   | 33       | Positive | No          | Mild              | 16                      | 20/05/2021       |
|                                       | <b>GV-42</b>  | Male   | 25       | Positive | No          | Mild              | 32                      | 03/06/2021       |
|                                       | <b>AK-16</b>  | Female | 46       | Positive | No          | Moderate          | 11                      | 27/08/2021       |
|                                       | <b>AK-18</b>  | Female | 25       | Positive | No          | Moderate          | 10                      | 03/09/2021       |
|                                       | <b>AK-20</b>  | Female | 58       | Positive | No          | Severe            | NA                      | 03/09/2021       |
|                                       | <b>AK-24</b>  | Female | 28       | Positive | No          | Severe            | 13                      | 08/09/2021       |
|                                       | <b>AK-25</b>  | Female | 42       | Positive | No          | Severe            | 7                       | 08/09/2021       |
|                                       | <b>IK-25</b>  | Male   | 61       | Positive | NA          | Moderate          | 7                       | 09/03/2022       |
|                                       | <b>IK-26</b>  | Female | 40       | Positive | NA          | Moderate          | 17                      | 06/08/2021       |
| <b>IK-32</b>                          | Male          | 36     | Positive | NA       | Moderate    | 19                | 01/09/2021              |                  |
| <b>A24-</b><br>COVID-19 convalescents | <b>AK-12</b>  | Male   | 53       | Negative | No          | Moderate          | 11                      | 25/08/2021       |
|                                       | <b>AK-19</b>  | Male   | 47       | Negative | No          | Severe            | 11                      | 03/09/2021       |
|                                       | <b>AK-32</b>  | Male   | 57       | Negative | No          | Moderate          | 10                      | 13/09/2021       |
|                                       | <b>IK-21</b>  | Female | 71       | Negative | NA          | Moderate          | 16                      | 30/07/2021       |
|                                       | <b>IK-22</b>  | Male   | 33       | Negative | NA          | Mild              | 14                      | 30/07/2021       |
|                                       | <b>IK-24</b>  | Male   | 43       | Negative | NA          | Moderate          | 17                      | 06/08/2021       |
|                                       | <b>IK-27</b>  | Female | 56       | Negative | NA          | Moderate          | 13                      | 06/08/2021       |
|                                       | <b>IK-33</b>  | Male   | 41       | Negative | NA          | Mild              | 34                      | 06/09/2021       |
| <b>IK-34</b>                          | Male          | 38     | Negative | NA       | Mild        | 46                | 16/09/2021              |                  |

NA – Not applicable

**Table S3: HLA binding of NF9-5X peptides.**

| Name     | Sequence           | Normalized log Kd |
|----------|--------------------|-------------------|
| NF9 (WT) | NYNY <b>L</b> YRLF | -6.83             |
| NF9-5A   | ---- <b>A</b> ---- | -6.90             |
| NF9-5C   | ---- <b>C</b> ---- | -6.12             |
| NF9-5D   | ---- <b>D</b> ---- | -6.17             |
| NF9-5E   | ---- <b>E</b> ---- | -5.90             |
| NF9-5F   | ---- <b>F</b> ---- | -6.72             |
| NF9-5G   | ---- <b>G</b> ---- | -6.56             |
| NF9-5H   | ---- <b>H</b> ---- | -6.93             |
| NF9-5I   | ---- <b>I</b> ---- | -7.03             |
| NF9-5K   | ---- <b>K</b> ---- | -6.94             |
| NF9-5M   | ---- <b>M</b> ---- | -6.85             |
| NF9-5N   | ---- <b>N</b> ---- | -7.00             |
| NF9-5P   | ---- <b>P</b> ---- | -6.82             |
| NF9-5Q   | ---- <b>Q</b> ---- | -6.55             |
| NF9-5R   | ---- <b>R</b> ---- | -6.35             |
| NF9-5V   | ---- <b>V</b> ---- | -6.68             |
| NF9-5S   | ---- <b>S</b> ---- | -6.62             |
| NF9-5T   | ---- <b>T</b> ---- | -6.71             |
| NF9-5V   | ---- <b>V</b> ---- | -6.68             |
| NF9-5W   | ---- <b>W</b> ---- | -6.14             |
| NF9-5Y   | ---- <b>Y</b> ---- | -6.50             |

Colors of text in name column match those used elsewhere in this study

**Table S4: Crystallography statistics for X-ray crystallography structures in this study**

| PDB Entry                                                | 28IL                                                                                     | 8RJH                                                     | 8RJI                                       |
|----------------------------------------------------------|------------------------------------------------------------------------------------------|----------------------------------------------------------|--------------------------------------------|
| Protein                                                  | P1-15:HLA A*2402-NF9                                                                     | HLA A*2402-NF9 6F                                        | HLA A*2402-NF9 5R                          |
| <b>Data Collection</b>                                   |                                                                                          |                                                          |                                            |
| Diamond Beamline                                         | I04                                                                                      | I04                                                      | I04                                        |
| Date                                                     | 28-04-2022                                                                               | 28-04-2022                                               | 28-04-2022                                 |
| Wavelength                                               | 0.9795                                                                                   | 0.9795                                                   | 0.9795                                     |
| <b>Crystal Data (outer shell statistics in brackets)</b> |                                                                                          |                                                          |                                            |
| Crystallisation Conditions                               | 0.1 M di-Sodium malonate, 0.1 M HEPES, 30% w/v Poly(acrylic acid sodium salt) 2,100, pH7 | 0.1M Sodium cacodylate, 20% PEG 4000, 15% Glycerol, pH 6 | 0.1M MES, 20% PEG 4000, 15% Glycerol, pH 7 |
| <i>a,b,c</i> (Å)                                         | 200.44, 200.44, 156.27                                                                   | 344.8, 84.34, 91.45                                      | 103.28, 77.02, 111.82                      |
| $\alpha,\beta,\gamma$ (°)                                | 90.0, 90.0, 120.0                                                                        | 90.00, 102.14, 90.00                                     | 90.00, 110.58, 90.00                       |
| Space group                                              | P 3 <sub>1</sub> 2 1                                                                     | C 1 2 1                                                  | P 1 2 <sub>1</sub> 1                       |
| Resolution (Å)                                           | 3.1 – 60.49                                                                              | 2.60 – 86.92                                             | 2.3 – 54.8                                 |
| Outer shell                                              | 3.10 – 3.18                                                                              | 2.60 – 2.65                                              | 2.3 – 2.35                                 |
| <i>R</i> -merge (%)                                      | 0.287 (3.769)                                                                            | 0.166 (1.581)                                            | 0.144 (1.088)                              |
| <i>R</i> -pim                                            | 0.091 (1.171)                                                                            | 0.101 (1.021)                                            | 0.089 (0.686)                              |
| <i>R</i> -meas (%)                                       | 0.300 (3.941)                                                                            | 0.195 (1.887)                                            | 0.170 (1.289)                              |
| CC1/2                                                    | 0.997 (0.407)                                                                            | 0.995 (0.465)                                            | 0.996 (0.677)                              |
| <i>I</i> / $\sigma$ ( <i>I</i> )                         | 8.8 (0.9)                                                                                | 7.7 (1.0)                                                | 8.0 (1.5)                                  |
| Completeness (%)                                         | 100 (100)                                                                                | 100 (99.5)                                               | 99.6 (96.3)                                |
| Multiplicity                                             | 21 (22)                                                                                  | 7.1 (6.6)                                                | 7.0 (6.9)                                  |
| Total Measurements                                       | 1,387,790 (101,844)                                                                      | 564,978 (29,665)                                         | 512,213 (29,794)                           |
| Unique Reflections                                       | 65,958 (4,631)                                                                           | 79,258 (4,490)                                           | 73,135 (4,344)                             |
| Wilson B-factor(Å <sup>2</sup> )                         | 93                                                                                       | 51.1                                                     | 33.7                                       |
| <b>Refinement Statistics</b>                             |                                                                                          |                                                          |                                            |
| Non-H Atoms                                              | 14,898                                                                                   | 19,159                                                   | 13,033                                     |
| <i>R</i> -work reflections                               | 62481                                                                                    | 75,257                                                   | 73,254                                     |
| <i>R</i> -free reflections                               | 3,218                                                                                    | 3,967                                                    | 3,602                                      |
| <i>R</i> -work/ <i>R</i> -free (%)                       | 19.0 / 23.1                                                                              | 22.4 / 26.4                                              | 21.7 / 26.5                                |
| <b>rms deviations (ML target in brackets)</b>            |                                                                                          |                                                          |                                            |
| Bond lengths (Å)                                         | 0.006 (0.012)                                                                            | 0.010 (0.013)                                            | 0.012 (0.013)                              |
| Bond Angles (°)                                          | 1.504 (1.772)                                                                            | 1.372 (1.648)                                            | 1.447 (1.647)                              |
| <sup>1</sup> Coordinate error                            | 0.355                                                                                    | 0.323                                                    | 0.4401                                     |
| Mean B value (Å <sup>2</sup> )                           | 112.3                                                                                    | 63.2                                                     | 39.2                                       |
| <b>Ramachandran Statistics</b>                           |                                                                                          |                                                          |                                            |
| Favoured/Outliers                                        | 1459 / 20                                                                                | 2152 / 1                                                 | 1429 / 6                                   |
| %                                                        | 89 / 1                                                                                   | 95 / 0                                                   | 94 / 0                                     |

\* One crystal was used for determining each structure.

<sup>1</sup> Coordinate Estimated Standard Uncertainty in (Å), calculated based on maximum likelihood statistics.

**Table S5. Molecular contacts between the P1-15 T-cell Receptor and the A24/NF9 peptide:MHC complex.** Note that the P1-15 TCR  $\beta$ -chain construct contained a short N-terminal extension resulting from the expression system, and the PDB numbering therefore begins from the first residue of this construct. For consistency with the published literature (e.g., PDB: 8YE4), amino acid numbering in this manuscript follows the canonical TCR sequence i.e., -3 relative to the PDB files for the  $\beta$  chain.

| CDR loop      | TCR residue | Peptide residue | MHC residue | VdWs ( $\leq 4$ Å) | H-bonds ( $\leq 3.4$ Å) |
|---------------|-------------|-----------------|-------------|--------------------|-------------------------|
| CDR1 $\alpha$ | Ala29       | Tyr4            |             | 3                  |                         |
|               | Gln31       |                 | Gln155      | 2                  |                         |
|               |             | Tyr4            |             | 8                  |                         |
|               |             | Tyr6            |             | 1                  |                         |
|               | Ser32       | Tyr6            |             | 2                  |                         |
| CDR2 $\alpha$ | Tyr51       |                 | Ala150      | 1                  |                         |
|               |             |                 | His151      | 23                 |                         |
|               |             |                 | Glu154      | 1                  |                         |
|               | Ser52       |                 | Glu154      | 2                  |                         |
|               | Ser53       |                 | Glu154      | 4                  |                         |
| FW $\alpha$   | Arg66       |                 | Ala158      | 3                  |                         |
| CDR3 $\alpha$ | Asn91       | Tyr6            |             | 4                  |                         |
|               | Leu93       |                 | Glu62       | 1                  |                         |
|               |             |                 | Gly65       | 2                  |                         |
|               |             |                 | Lys66       | 3                  |                         |
|               | Asn95       |                 | Gly65       | 1                  |                         |
|               | Ser96       |                 | Gly65       | 1                  |                         |
|               |             |                 | Gly68       | 1                  |                         |
|               | Tyr98       |                 | Lys66       | 2                  |                         |
|               |             |                 | Ala69       | 1                  |                         |
|               |             | Asn3            |             | 1                  |                         |
|               |             | Tyr4            |             | 8                  |                         |
|               | Leu5        |                 | 5           | 1                  |                         |
|               | Tyr6        |                 | 4           |                    |                         |
| CDR1 $\beta$  | Asn30       |                 | Glu76       |                    | 1                       |
| CDR3 $\beta$  | Ser96       | Leu8            |             | 2                  |                         |
|               | Gly97       | Tyr6            |             | 1                  |                         |
|               | Gly98       | Tyr6            |             | 2                  |                         |
|               | Tyr99       | Tyr6            |             | 1                  |                         |
|               |             | Arg7            |             | 12                 | 1                       |
|               |             | Leu8            |             | 5                  |                         |

**Table S1: Donor information related to Fig. 1, 2 and 7.**

| Donor ID | Sex    | Age | HLA-A24? | vaccinated? | Days after 2 <sup>nd</sup> vax | Blood collection |
|----------|--------|-----|----------|-------------|--------------------------------|------------------|
| VKU-1    | Male   | 48  | Positive | BNT162b2    | 35                             | 03/05/2021       |
| VKU-2    | Male   | 37  | Positive | BNT162b2    | 35                             | 03/05/2021       |
| VKU-3    | Male   | 40  | Positive | BNT162b2    | 35                             | 03/05/2021       |
| VKU-5    | Male   | 34  | Negative | BNT162b2    | 35                             | 03/05/2021       |
| VKU-7    | Male   | 55  | Positive | BNT162b2    | 31                             | 08/05/2021       |
| VKU-8    | Male   | 55  | Negative | BNT162b2    | 35                             | 08/05/2021       |
| VKU-10   | Female | 60  | Positive | BNT162b2    | 48                             | 03/05/2021       |
| VKU-11   | Female | 39  | Positive | BNT162b2    | 34                             | 25/05/2021       |
| VKU-16   | Male   | 54  | Negative | BNT162b2    | 35                             | 08/05/2021       |
| VKU-17   | Male   | 35  | Negative | BNT162b2    | 35                             | 25/05/2021       |
| VKU-18   | Female | 38  | Positive | BNT162b2    | 35                             | 25/05/2021       |
| VKU-19   | Female | 36  | Positive | BNT162b2    | 35                             | 27/05/2021       |
| VKU-20   | Male   | 33  | Negative | BNT162b2    | 34                             | 25/05/2021       |
| VKU-21   | Female | 27  | Negative | BNT162b2    | 34                             | 25/05/2021       |
| VKU-22   | Male   | 34  | Positive | BNT162b2    | 36                             | 27/05/2021       |
| VKU-23   | Male   | 54  | Positive | BNT162b2    | 49                             | 27/05/2021       |
| VKU-25   | Male   | 46  | Negative | BNT162b2    | 34                             | 25/05/2021       |
| VKU-27   | Male   | 43  | Negative | BNT162b2    | 35                             | 27/05/2021       |
| VKU-28   | Male   | 30  | Positive | BNT162b2    | 35                             | 10/06/2021       |
| VKU-41   | Male   | 34  | Negative | BNT162b2    | 35                             | 27/05/2021       |
| VKU-42   | Male   | 34  | Positive | BNT162b2    | 35                             | 27/05/2021       |
| VKU-43   | Male   | 38  | Negative | BNT162b2    | 35                             | 27/05/2021       |
| VKU-44   | Male   | 29  | Positive | BNT162b2    | 31                             | 25/05/2021       |
| VKU-45   | Male   | 27  | Negative | BNT162b2    | 35                             | 27/05/2021       |
| VKU-46   | Female | 40  | Negative | BNT162b2    | 35                             | 27/05/2021       |
| VKU-47   | Female | 57  | Negative | BNT162b2    | 31                             | 25/05/2021       |
| VKU-48   | Male   | 59  | Positive | BNT162b2    | 35                             | 27/05/2021       |
| GV9      | Female | 24  | Positive | BNT162b2    | 202                            | 27/12/2021       |
| GV12     | Female | 28  | Negative | BNT162b2    | 23                             | 01/07/2021       |
| GV15     | Female | 23  | Positive | BNT162b2    | 182                            | 06/01/2022       |
| GV16     | Male   | 22  | Positive | No          | NA                             | 17/05/2021       |
| GV16-1   | Male   | 22  | Positive | BNT162b2    | 202                            | 27/12/2021       |
| GV17     | Male   | 24  | Negative | BNT162b2    | 21                             | 29/06/2021       |
| GV19     | Male   | 24  | Positive | BNT162b2    | 202                            | 27/12/2021       |
| GV24     | Male   | 23  | Positive | BNT162b2    | 212                            | 06/01/2022       |
| GV25     | Male   | 24  | Negative | BNT162b2    | 22                             | 30/06/2021       |
| GV26     | Male   | 23  | Positive | BNT162b2    | 212                            | 06/01/2022       |
| GV27     | Female | 23  | Negative | BNT162b2    | 21                             | 29/06/2021       |
| GV32     | Male   | 56  | Positive | No          | NA                             | 11/05/2021       |
| GV32-1   | Male   | 56  | Positive | BNT162b2    | 27                             | 05/07/2021       |
| GV32-2   | Male   | 56  | Positive | BNT162b2    | 195                            | 20/12/2021       |
| GV33     | Male   | 39  | Positive | No          | NA                             | 11/05/2021       |
| GV33-1   | Male   | 39  | Positive | BNT162b2    | 24                             | 28/07/2021       |
| GV33-2   | Male   | 39  | Positive | BNT162b2    | 192                            | 20/12/2021       |
| GV34     | Female | 38  | Positive | BNT162b2    | 24                             | 05/07/2021       |
| GV35     | Male   | 52  | Positive | BNT162b2    | 24                             | 05/07/2021       |
| GV36     | Male   | 41  | Positive | BNT162b2    | 21                             | 05/07/2021       |
| GV36-1   | Male   | 41  | Positive | BNT162b2    | 192                            | 20/12/2021       |
| GV52     | Female | 67  | Positive | BNT162b2    | 21                             | 05/07/2021       |
| GV59     | Male   | 37  | Positive | BNT162b2    | 25                             | 15/09/2021       |
| GV59-1   | Male   | 37  | Positive | BNT162b2    | 126                            | 20/12/2021       |
| GV60     | Male   | 51  | Positive | mRNA-1273   | 116                            | 20/12/2021       |

**Table S2: Convalescent donor information related to Fig. 2 and 6.**

| Cohort                                | Donor ID      | Sex    | Age | HLA-A24? | vaccinated? | COVID-19 severity | Days post PCR+ or onset | Blood collection |
|---------------------------------------|---------------|--------|-----|----------|-------------|-------------------|-------------------------|------------------|
| <b>A24+</b><br>COVID-19 convalescents | <b>KK-008</b> | Male   | 63  | Positive | No          | Mild              | 17                      | 19/08/2021       |
|                                       | <b>GV-38</b>  | Male   | 23  | Positive | No          | Mild              | 18                      | 20/05/2021       |
|                                       | <b>GV-41</b>  | Male   | 33  | Positive | No          | Mild              | 16                      | 20/05/2021       |
|                                       | <b>GV-42</b>  | Male   | 25  | Positive | No          | Mild              | 32                      | 03/06/2021       |
|                                       | <b>AK-16</b>  | Female | 46  | Positive | No          | Moderate          | 11                      | 27/08/2021       |
|                                       | <b>AK-18</b>  | Female | 25  | Positive | No          | Moderate          | 10                      | 03/09/2021       |
|                                       | <b>AK-20</b>  | Female | 58  | Positive | No          | Severe            | NA                      | 03/09/2021       |
|                                       | <b>AK-24</b>  | Female | 28  | Positive | No          | Severe            | 13                      | 08/09/2021       |
|                                       | <b>AK-25</b>  | Female | 42  | Positive | No          | Severe            | 7                       | 08/09/2021       |
|                                       | <b>IK-25</b>  | Male   | 61  | Positive | NA          | Moderate          | 7                       | 09/03/2022       |
|                                       | <b>IK-26</b>  | Female | 40  | Positive | NA          | Moderate          | 17                      | 06/08/2021       |
|                                       | <b>IK-32</b>  | Male   | 36  | Positive | NA          | Moderate          | 19                      | 01/09/2021       |
| <b>A24-</b><br>COVID-19 convalescents | <b>AK-12</b>  | Male   | 53  | Negative | No          | Moderate          | 11                      | 25/08/2021       |
|                                       | <b>AK-19</b>  | Male   | 47  | Negative | No          | Severe            | 11                      | 03/09/2021       |
|                                       | <b>AK-32</b>  | Male   | 57  | Negative | No          | Moderate          | 10                      | 13/09/2021       |
|                                       | <b>IK-21</b>  | Female | 71  | Negative | NA          | Moderate          | 16                      | 30/07/2021       |
|                                       | <b>IK-22</b>  | Male   | 33  | Negative | NA          | Mild              | 14                      | 30/07/2021       |
|                                       | <b>IK-24</b>  | Male   | 43  | Negative | NA          | Moderate          | 17                      | 06/08/2021       |
|                                       | <b>IK-27</b>  | Female | 56  | Negative | NA          | Moderate          | 13                      | 06/08/2021       |
|                                       | <b>IK-33</b>  | Male   | 41  | Negative | NA          | Mild              | 34                      | 06/09/2021       |
|                                       | <b>IK-34</b>  | Male   | 38  | Negative | NA          | Mild              | 46                      | 16/09/2021       |

NA – Not applicable

**Table S3: HLA binding of NF9-5X peptides.**

| Name     | Sequence           | Normalized log Kd |
|----------|--------------------|-------------------|
| NF9 (WT) | NYNY <b>L</b> YRLF | -6.83             |
| NF9-5A   | ---- <b>A</b> ---- | -6.90             |
| NF9-5C   | ---- <b>C</b> ---- | -6.12             |
| NF9-5D   | ---- <b>D</b> ---- | -6.17             |
| NF9-5E   | ---- <b>E</b> ---- | -5.90             |
| NF9-5F   | ---- <b>F</b> ---- | -6.72             |
| NF9-5G   | ---- <b>G</b> ---- | -6.56             |
| NF9-5H   | ---- <b>H</b> ---- | -6.93             |
| NF9-5I   | ---- <b>I</b> ---- | -7.03             |
| NF9-5K   | ---- <b>K</b> ---- | -6.94             |
| NF9-5M   | ---- <b>M</b> ---- | -6.85             |
| NF9-5N   | ---- <b>N</b> ---- | -7.00             |
| NF9-5P   | ---- <b>P</b> ---- | -6.82             |
| NF9-5Q   | ---- <b>Q</b> ---- | -6.55             |
| NF9-5R   | ---- <b>R</b> ---- | -6.35             |
| NF9-5V   | ---- <b>V</b> ---- | -6.68             |
| NF9-5S   | ---- <b>S</b> ---- | -6.62             |
| NF9-5T   | ---- <b>T</b> ---- | -6.71             |
| NF9-5V   | ---- <b>V</b> ---- | -6.68             |
| NF9-5W   | ---- <b>W</b> ---- | -6.14             |
| NF9-5Y   | ---- <b>Y</b> ---- | -6.50             |

Colors of text in name column match those used elsewhere in this study

**Table S4: Crystallography statistics for X-ray crystallography structures in this study**

| PDB Entry                                                | 28IL                                                                                     | 8RJH                                                     | 8RJI                                       |
|----------------------------------------------------------|------------------------------------------------------------------------------------------|----------------------------------------------------------|--------------------------------------------|
| Protein                                                  | P1-15:HLA A*2402-NF9                                                                     | HLA A*2402-NF9_6F                                        | HLA A*2402-NF9_5R                          |
| <b>Data Collection</b>                                   |                                                                                          |                                                          |                                            |
| Diamond Beamline                                         | I04                                                                                      | I04                                                      | I04                                        |
| Date                                                     | 28-04-2022                                                                               | 28-04-2022                                               | 28-04-2022                                 |
| Wavelength                                               | 0.9795                                                                                   | 0.9795                                                   | 0.9795                                     |
| <b>Crystal Data (outer shell statistics in brackets)</b> |                                                                                          |                                                          |                                            |
| Crystallisation Conditions                               | 0.1 M di-Sodium malonate, 0.1 M HEPES, 30% w/v Poly(acrylic acid sodium salt) 2,100, pH7 | 0.1M Sodium cacodylate, 20% PEG 4000, 15% Glycerol, pH 6 | 0.1M MES, 20% PEG 4000, 15% Glycerol, pH 7 |
| a,b,c (Å)                                                | 200.44, 200.44, 156.27                                                                   | 344.8, 84.34, 91.45                                      | 103.28, 77.02, 111.82                      |
| $\alpha,\beta,\gamma$ (°)                                | 90.0, 90.0, 120.0                                                                        | 90.00, 102.14, 90.00                                     | 90.00, 110.58, 90.00                       |
| Space group                                              | P 3 <sub>1</sub> 2 1                                                                     | C 1 2 1                                                  | P 1 2 <sub>1</sub> 1                       |
| Resolution (Å)                                           | 3.1 – 60.49                                                                              | 2.60 – 86.92                                             | 2.3 – 54.8                                 |
| Outer shell                                              | 3.10 – 3.18                                                                              | 2.60 – 2.65                                              | 2.3 – 2.35                                 |
| R-merge (%)                                              | 0.287 (3.769)                                                                            | 0.166 (1.581)                                            | 0.144 (1.088)                              |
| R-pim                                                    | 0.091 (1.171)                                                                            | 0.101 (1.021)                                            | 0.089 (0.686)                              |
| R-meas (%)                                               | 0.300 (3.941)                                                                            | 0.195 (1.887)                                            | 0.170 (1.289)                              |
| CC1/2                                                    | 0.997 (0.407)                                                                            | 0.995 (0.465)                                            | 0.996 (0.677)                              |
| I / $\sigma$ (I)                                         | 8.8 (0.9)                                                                                | 7.7 (1.0)                                                | 8.0 (1.5)                                  |
| Completeness (%)                                         | 100 (100)                                                                                | 100 (99.5)                                               | 99.6 (96.3)                                |
| Multiplicity                                             | 21 (22)                                                                                  | 7.1 (6.6)                                                | 7.0 (6.9)                                  |
| Total Measurements                                       | 1,387,790 (101,844)                                                                      | 564,978 (29,665)                                         | 512,213 (29,794)                           |
| Unique Reflections                                       | 65,958 (4,631)                                                                           | 79,258 (4,490)                                           | 73,135 (4,344)                             |
| Wilson B-factor(Å <sup>2</sup> )                         | 93                                                                                       | 51.1                                                     | 33.7                                       |
| <b>Refinement Statistics</b>                             |                                                                                          |                                                          |                                            |
| Non-H Atoms                                              | 14,898                                                                                   | 19,159                                                   | 13,033                                     |
| R-work reflections                                       | 62481                                                                                    | 75,257                                                   | 73,254                                     |
| R-free reflections                                       | 3,218                                                                                    | 3,967                                                    | 3,602                                      |
| R-work/R-free (%)                                        | 19.0 / 23.1                                                                              | 22.4 / 26.4                                              | 21.7 / 26.5                                |
| <b>rms deviations (ML target in brackets)</b>            |                                                                                          |                                                          |                                            |
| Bond lengths (Å)                                         | 0.006 (0.012)                                                                            | 0.010 (0.013)                                            | 0.012 (0.013)                              |
| Bond Angles (°)                                          | 1.504 (1.772)                                                                            | 1.372 (1.648)                                            | 1.447 (1.647)                              |
| <sup>1</sup> Coordinate error                            | 0.355                                                                                    | 0.323                                                    | 0.4401                                     |
| Mean B value (Å <sup>2</sup> )                           | 112.3                                                                                    | 63.2                                                     | 39.2                                       |
| <b>Ramachandran Statistics</b>                           |                                                                                          |                                                          |                                            |
| Favoured/Outliers                                        | 1459 / 20                                                                                | 2152 / 1                                                 | 1429 / 6                                   |
| %                                                        | 89 / 1                                                                                   | 95 / 0                                                   | 94 / 0                                     |

\* One crystal was used for determining each structure.

<sup>1</sup> Coordinate Estimated Standard Uncertainty in (Å), calculated based on maximum likelihood statistics.

**Table S5. Molecular contacts between the P1-15 T-cell Receptor and the A24/NF9 peptide:MHC complex.** Note that the P1-15 TCR  $\beta$ -chain construct contained a short N-terminal extension resulting from the expression system, and the PDB numbering therefore begins from the first residue of this construct. For consistency with the published literature (e.g., PDB: 8YE4), amino acid numbering in this manuscript follows the canonical TCR sequence i.e., -3 relative to the PDB files for the  $\beta$  chain.

| CDR loop      | TCR residue | Peptide residue | MHC residue | VdWs ( $\leq 4$ Å) | H-bonds ( $\leq 3.4$ Å) |
|---------------|-------------|-----------------|-------------|--------------------|-------------------------|
| CDR1 $\alpha$ | Ala29       | Tyr4            |             | 3                  |                         |
|               | Gln31       |                 | Gln155      | 2                  |                         |
|               |             | Tyr4            |             | 8                  |                         |
|               |             | Tyr6            |             | 1                  |                         |
|               | Ser32       | Tyr6            |             | 2                  |                         |
| CDR2 $\alpha$ | Tyr51       |                 | Ala150      | 1                  |                         |
|               |             |                 | His151      | 23                 |                         |
|               |             |                 | Glu154      | 1                  |                         |
|               | Ser52       |                 | Glu154      | 2                  |                         |
|               | Ser53       |                 | Glu154      | 4                  |                         |
| FW $\alpha$   | Arg66       |                 | Ala158      | 3                  |                         |
| CDR3 $\alpha$ | Asn91       | Tyr6            |             | 4                  |                         |
|               | Leu93       |                 | Glu62       | 1                  |                         |
|               |             |                 | Gly65       | 2                  |                         |
|               |             |                 | Lys66       | 3                  |                         |
|               | Asn95       |                 | Gly65       | 1                  |                         |
|               | Ser96       |                 | Gly65       | 1                  |                         |
|               |             |                 | Gly68       | 1                  |                         |
|               | Tyr98       |                 | Lys66       | 2                  |                         |
|               |             |                 | Ala69       | 1                  |                         |
|               |             | Asn3            |             | 1                  |                         |
|               |             | Tyr4            |             | 8                  |                         |
|               | Leu5        |                 | 5           | 1                  |                         |
|               | Tyr6        |                 | 4           |                    |                         |
| CDR1 $\beta$  | Asn30       |                 | Glu76       |                    | 1                       |
| CDR3 $\beta$  | Ser96       | Leu8            |             | 2                  |                         |
|               | Gly97       | Tyr6            |             | 1                  |                         |
|               | Gly98       | Tyr6            |             | 2                  |                         |
|               | Tyr99       | Tyr6            |             | 1                  |                         |
|               |             | Arg7            |             | 12                 | 1                       |
|               | Leu8        |                 | 5           |                    |                         |

**Supplemental Table 6. Cell identities in Figure 4**

| Cluster ID | Top GSEA term                      | RSV* | Original identity           | ISGs    | Name                                    |
|------------|------------------------------------|------|-----------------------------|---------|-----------------------------------------|
| 0          | HALLMARK_E2F_TARGET                | neg  | iAT2s (mono- and coculture) | neg     | Proliferating iAT2s (S)                 |
| 1          | HALLMARK_ESTROGEN_RESPONSE_EARLY   | neg  | iAT2s (mono- and coculture) | pos     | Antiviral bystander iAT2s               |
| 2          | HALLMARK_UV_RESPONSE_DN            | neg  | iAT2s (co)                  | pos     | Antiviral bystander iAT2s (cocultured)  |
| 3          | HALLMARK_INTERFERON_GAMMA_RESPONSE | pos  | iMacs (mono)                | pos     | RSV* iMacs (monoculture)                |
| 4          | HALLMARK_E2F_TARGET                | neg  | iAT2s (mono- and coculture) | pos/neg | Proliferating iAT2s (G2M)               |
| 5          | HALLMARK_OXIDATIVE_PHOSPHORYLATION | neg  | iAT2s (mono- and coculture) | neg     | iAT2s                                   |
| 6          | HALLMARK_MYC_TARGETS_V1            | neg  | iAT2s (mono- and coculture) | neg     | iAT2s                                   |
| 7          | HALLMARK_E2F_TARGET                | neg  | iAT2s (co)                  | pos/neg | Proliferating iAT2s (cocultured)        |
| 8          | HALLMARK_TNFA_SIGNALING_VIA_NFKB   | neg  | iMacs (mono)                | pos     | Antiviral bystander iMacs (monoculture) |
| 9          | HALLMARK_INTERFERON_GAMMA_RESPONSE | neg  | iMacs (co)                  | pos     | Antiviral bystander iMacs (coculture)   |
| 10         | HALLMARK_INTERFERON_GAMMA_RESPONSE | pos  | iMacs (co)                  | pos     | RSV* iMacs (coculture)                  |
| 11         | HALLMARK_OXIDATIVE_PHOSPHORYLATION | neg  | iAT2s (mono- and coculture) | neg     | iAT2s                                   |
| 12         | HALLMARK_HYPOXIA                   | pos  | iAT2s (mono- and coculture) | pos     | RSV* iAT2s                              |

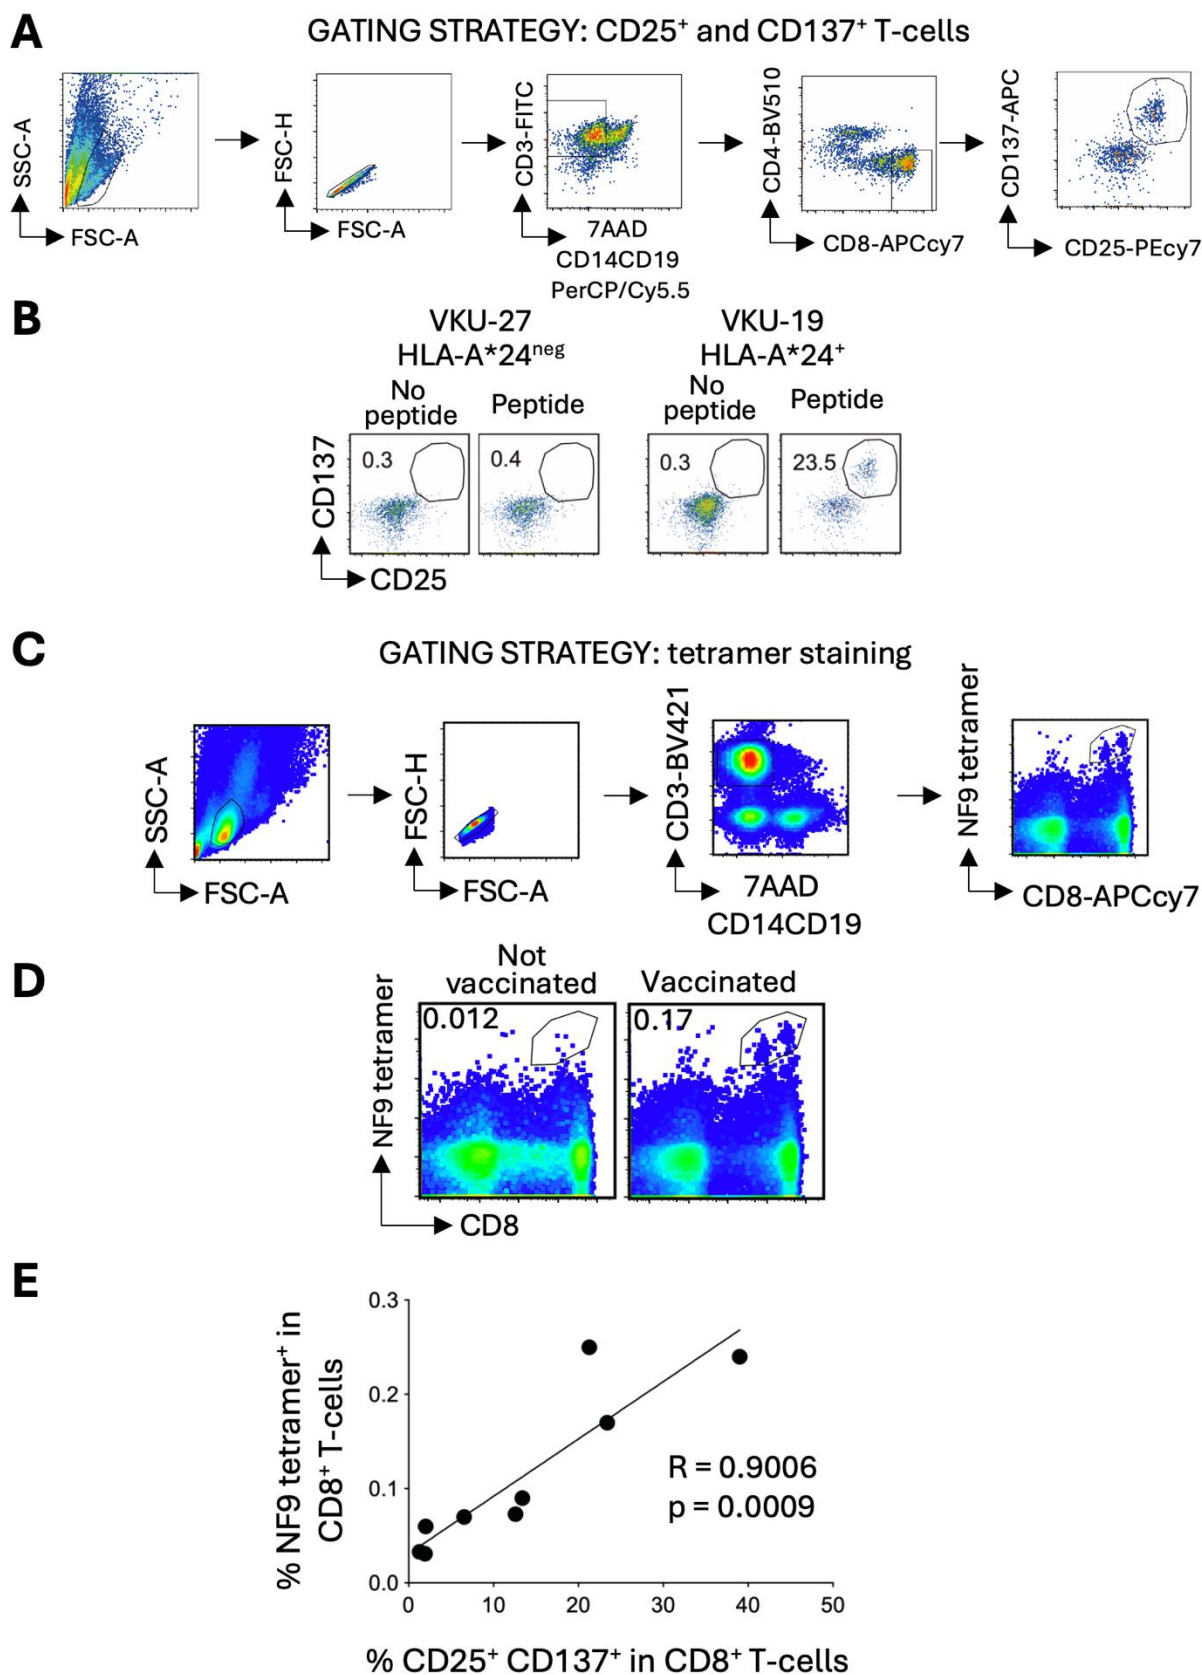

**Supplemental Figure S1. Flow cytometry gating strategies, representative flow cytometry plots, and correlation between activation status and tetramer staining for the HLA-A\*24:02 NF9 epitope.**

(A) Flow cytometry gating strategy of CD25<sup>+</sup>CD137<sup>+</sup> T-cell lines from donor VKU19. (B) CD8<sup>+</sup>CD25<sup>+</sup>CD137<sup>+</sup> data for an HLA-A\*24:02 positive and negative donor. (C) HLA-A\*24:02 NF9 tetramer staining of PBMCs from donor VKU-19. (E) Correlation between the frequency of CD25<sup>+</sup>CD137<sup>+</sup>CD8<sup>+</sup> activated T cells and that of HLA-A\*24:02 NF9 tetramer<sup>+</sup>CD8<sup>+</sup> T cells in HLA-A\*24:02<sup>+</sup> vaccinated donors (n = 9). R = 0.9006 and \*\*\* p = 0.0009 by two-tailed Person test.

**GV32**

| TRAV      | TRAJ  | CDR3α              | TRBV    | TRBD | TRBJ   | CDR3β           | %    |
|-----------|-------|--------------------|---------|------|--------|-----------------|------|
| 12-1*01   | 41*01 | CVVNLNLSNGYALN F   | 6-1*01  | 2*01 | 2-7*01 | CASSEAGGYEQYF   | 12.5 |
| 14/DV4*02 | 45*01 | CAMREPPPIRGADGLTF  | 2*01    | 1*01 | 2-7*01 | CASSEGGGYEQYF   | 8.3  |
| 14/DV4*02 | 50*01 | CAMRELKGVKTSYDKVIF | 6-1*01  | 2*02 | 2-7*01 | CASSEGRGYEQYF   | 4.2  |
| 8-6*02    | 17*01 | SPGAAGNKLTF        | 6-1*01  | 2*01 | 2-7*01 | CASSETGGYEQYF   | 5.0  |
| 16*01     | 6*01  | CALSGPSSGAGGSYIPTF | 5-4*01  | 2*01 | 2-7*01 | CASSETSGYEQYF   | 4.2  |
| 12-2*01   | 20*01 | CATHLALRADYKLSF    | 5-1*01  | 1*01 | 2-7*01 | CASSDRTGYYEQYF  | 4.2  |
| 12-1*01   | 5*01  | CVVKGTGRRALTF      | 11-1*01 | 1*01 | 2-7*01 | CASSLWQGYEQYF   | 4.2  |
| 21*02     | 47*01 | CAVNSYGNKLVF       | 5-1*01  | 1*01 | 2-7*01 | CASSPGTGYEQYF   | 4.2  |
| 4*01      | 36*01 | CLVGDGGGANNLFF     | 4-1*01  | 2*01 | 2-7*01 | CASSQGLGYEQYF   | 4.2  |
| 12-2*02   | 35*01 | CAVNGFGNVLHC       | 10-1*01 | 2*01 | 2-7*01 | CASSESIAYEQYF   | 4.2  |
| 21*02     | 26*01 | CAVPPNNYGNQFVIF    | 2*01    | 1*01 | 2-7*01 | CASSEFGRVGYEQYF | 4.2  |
| 12-2*01   | 40*01 | CAVNSGTYYKIF       | 5-1*01  | 1*01 | 2-7*01 | CASSEGAGGYEQYF  | 4.2  |
| 12-1*01   | 8*01  | CVVSTPLMNTGFGQKLVF | 6-1*01  | 1*01 | 2-7*01 | CASSEGGQYEQYF   | 4.2  |
| 26-2*01   | 32*02 | CILFYGGATNKLIF     | 2*01    | 1*01 | 2-7*01 | CASSEGGQLPYEQYF | 4.2  |
| 14/DV4*02 | 52*01 | CAIVGGTSGYKLVF     | 19*01   | 1*01 | 2-7*01 | CASSLAEGTTEAFF  | 4.2  |
| 27*01     | 23*01 | CAGARNQGGKLVF      | 27*01   | 1*01 | 1-1*01 | CASSLGGHNPEEAF  | 4.2  |
| 23/DV6*01 | 45*01 | CAAGSGGGADGLTF     | 2*01    | 2*02 | 2-7*01 | CASNFEQSSYEQYF  | 4.2  |
| 17*01     | 20*01 | CATAPWDYKLSF       | 5-6*01  | 1*01 | 1-1*01 | CASSLQGTTEAFF   | 4.2  |
| 17*01     | 40*01 | CATVTTYKIF         | 5-4*01  | -    | 2-7*01 | CASSLGSADQYF    | 4.2  |
| 14-1*01   | 4*01  | CAASGGYGNKLVF      | 27*01   | 1*01 | 2-1*01 | CASSLSLGEQYF    | 4.2  |
| 12-1*01   | 9*01  | CVVTLYTGGFKTIF     | 7-9*03  | 1*01 | 1-1*01 | CASSQPGADEAFF   | 4.2  |

**GV34**

| TRAV        | TRAJ  | CDR3α               | TRBV    | TRBD | TRBJ   | CDR3β             | %   |
|-------------|-------|---------------------|---------|------|--------|-------------------|-----|
| 13-1*02     | 44*01 | SRNTGTASKLTF        | 5-1*01  | 1*01 | 2-7*01 | CASSFGQGYEQYF     | 8.6 |
| 12-1*01     | 33*01 | CVVNLFDNSNYQLIW     | 5-1*01  | 1*01 | 2-7*01 | CASSLGGQGYEQYF    | 5.7 |
| 12-1*01     | 33*01 | CVVNLFDNSNYQLIW     | 2*01    | 1*01 | 2-7*01 | CASSEBAGGYEQYF    | 2.9 |
| 12-1*01     | 28*01 | CVVNNMYSYGAGSYQLTF  | 6-1*01  | 2*01 | 1-1*01 | CASSEBAGYEAFF     | 2.9 |
| 12-1*01     | 28*01 | CVVNNPLGGAGSYQLTF   | 6-4*01  | 1*01 | 2-7*01 | CASSEGGQGYEQYF    | 2.9 |
| 12-1*01     | 41*01 | CVVNGRRNSGYALNF     | 10-1*01 | -    | 2-7*01 | CASSESEFGYEQYF    | 2.9 |
| 12-1*01     | 28*01 | CVVNNKLDSSGAGSYQLTF | 5-1*01  | 2*01 | 2-7*01 | CASSLAGGYEQYF     | 2.9 |
| 12-1*01     | 8*01  | CVVNDNRGTFGQKLVF    | 2*01    | 1*01 | 2-7*01 | CASSEGAGYEQYF     | 2.9 |
| 12-1*01     | 8*01  | CVAREGGQKLVF        | 9*01    | 2*01 | 2-7*01 | CASSETPAYEQYF     | 2.9 |
| 5*01        | 32*01 | CAPRGATTAKLIF       | 6-1*01  | 1*01 | 2-7*01 | CASSEFGYEQYF      | 2.9 |
| 29/DV5*04   | 54*01 | CAASVIQGGAKLVF      | 4-1*01  | 1*01 | 2-7*01 | CASSPGRSYEQYF     | 2.9 |
| 20*04       | 49*01 | CAVPGYSRATGQNQLTF   | 2*01    | 1*01 | 2-7*01 | CASMVGLTYEQYF     | 2.9 |
| 38-2/DV8*01 | 42*01 | CAYRSAAWGPSSQGNLIF  | 3-1*01  | 1*01 | 2-7*01 | CASSWGDYEQYF      | 2.9 |
| 5*01        | 42*01 | CAESGSGQGNLIF       | 5-1*01  | 1*01 | 2-7*01 | CASMGQNYEQYF      | 2.9 |
| 21*01       | 58*01 | CAVRPETSNGRSLTF     | 6-5*01  | 2*01 | 2-1*01 | CASSALGLAAYNEQFF  | 2.9 |
| 27*01       | 35*01 | CAGAVGPGNVLHC       | 2*01    | 1*01 | 1-2*01 | CASSEAGVAVGYTF    | 2.9 |
| 17*01       | 52*01 | CATVNTAGGTSYKLVF    | 2*01    | 2*02 | 2-7*01 | CASSEWGGSYEQYF    | 2.9 |
| 8-6*02      | 18*01 | CAVSDRGSITLGRLYF    | 28*01   | 1*01 | 1-1*01 | CASSEFGAYDETAFF   | 2.9 |
| 12-2*01     | 54*01 | CAVNTGAKQKLVF       | 6-6*01  | 1*01 | 2-1*01 | CASSFPATGABQYF    | 2.9 |
| 17*01       | 8*01  | CATARDMGTGQKLVF     | 19*01   | 1*01 | 2-7*01 | CASSIGTPTTAREQYF  | 2.9 |
| 20*02       | 39*01 | CAVQNNNAGNMLTF      | 5-1*01  | 1*01 | 1-1*01 | CASSLESQTEAFF     | 2.9 |
| 13-3*01     | 57*01 | CAMSIQGGSEKLVF      | 5-6*01  | 2*02 | 1-5*01 | CASSLGGSAQHF      | 2.9 |
| 8-6*01      | 11*01 | CAVRRYSTLTF         | 5-6*01  | 1*01 | 2-7*01 | CASSLQARVPEYQYF   | 2.9 |
| 17*01       | 17*01 | CALGGAAGNKLTF       | 13*01   | -    | 2-3*01 | CASSLTTLQYF       | 2.9 |
| 29/DV5*04   | 39*01 | CAANDAGNMLTF        | 4-1*01  | 2*01 | 2-7*01 | CASSQDPAALGPEYQYF | 2.9 |
| 10*02       | 15*01 | CVV SARLNTDAASNLTF  | 11-3*01 | 1*01 | 2-1*01 | CASSSRARNEQFF     | 2.9 |
| 30*05       | 34*01 | CGTALPYNTDGLTF      | 7-2*02  | 2*01 | 2-5*01 | CASSRDTDLKETQYF   | 2.9 |
| 5*01        | 44*01 | CAETTKMGTASKLTF     | 7-6*01  | 1*01 | 2-5*01 | CASSSSRSGITQYF    | 2.9 |
| 19*01       | 36*01 | CALSESAGANNLFF      | 7-9*01  | 1*01 | 2-5*01 | CASSSWAQEQTQYF    | 2.9 |
| 5*01        | 30*01 | CVVNNRDKLIF         | 6-2*01  | 2*01 | 2-1*01 | CASSYSAGEQYF      | 2.9 |
| 12-1*01     | 12*01 | CVVITMDSYKLVF       | 20-1*01 | 1*01 | 2-7*01 | CSARPRQGVVEQYF    | 2.9 |
| 12-1*01     | 54*01 | CAVNBIOGAQKLVF      | 29-1*01 | 1*01 | 2-5*01 | CSVTPGGTQYF       | 2.9 |

**VK22**

| TRAV        | TRAJ  | CDR3α              | TRBV    | TRBD | TRBJ   | CDR3β              | %    |
|-------------|-------|--------------------|---------|------|--------|--------------------|------|
| 4*01        | 3*01  | CLVGGYSYSSASKLVF   | 2*01    | 1*01 | 2-7*01 | CASSEGRGYEQYF      | 13.0 |
| 12-1*01     | 33*01 | CVVNNLFDNSNYQLIW   | 2*01    | 2*01 | 2-7*01 | CASSEBAGYEQYF      | 4.3  |
| 12-1*01     | 28*01 | CVVNNMYSYGAGSYQLTF | 5-4*01  | 2*02 | 2-7*01 | CASSLAGGYEQYF      | 4.3  |
| 12-1*01     | 33*01 | CVVNGDSNYQLIW      | 4-1*01  | 1*01 | 2-7*01 | CASSQHQHYEQYF      | 4.3  |
| 12-1*01     | 42*01 | CVVTGGSGQGNLIF     | 20-1*02 | 2*01 | 2-7*01 | CSARDWLGTSDYEQYF   | 4.3  |
| 6*03        | 47*01 | CALAEYGNKLVF       | 6-5*01  | -    | 2-7*01 | CASSYSYGYEQYF      | 4.3  |
| 29/DV5*04   | 37*01 | CAAPGTSGGNTGKLVF   | 15*02   | 1*01 | 2-7*01 | CATSRILFVEYQYF     | 4.3  |
| 5*01        | 20*01 | CAETPSRGLSF        | 4-1*01  | 2*01 | 2-7*01 | CASSQDAGEQYF       | 4.3  |
| 2*01        | 11*01 | CAVEGYSYGYSTLTF    | 12-4*01 | 2*01 | 1-1*01 | CASLSEGAFF         | 4.3  |
| 20*02       | 42*01 | CALQTYNNGSGQGNLIF  | 9*01    | 2*02 | 2-1*01 | CASSAGLEGGGTNYEQFF | 4.3  |
| 24*01       | 32*02 | CASVGGATNKLIF      | 2*01    | 2*01 | 2-7*01 | CASSEFRGATYEQYF    | 4.3  |
| 38-2/DV8*01 | 43*01 | CALNQNNNDMLF       | 12-3*01 | 2*02 | 2-3*01 | CASSLTLAGPRTTQYF   | 4.3  |
| 12-2*02     | 9*01  | CAVRGFKTIF         | 12-3*01 | 1*01 | 2-1*01 | CASSPAPGSSGNEQFF   | 4.3  |
| 12-2*02     | 20*01 | CAVTNDYKLSF        | 6-5*01  | 2*01 | 2-3*01 | CASSPHLGGEDTQYF    | 4.3  |
| 26-1*01     | 23*01 | CIVDPWGGKLVF       | 9*01    | 1*01 | 1-1*01 | CASSSRQNTTEAFF     | 4.3  |
| 20*02       | 18*01 | CAVQVWDRGSLTGLRLYF | 30*01   | 1*01 | 1-1*01 | CAWSIQPGTEAFF      | 4.3  |
| 3*01        | 6*01  | CAVRDIRGSIPTF      | 30*01   | 1*01 | 1-1*01 | CASVQNTTEAFF       | 4.3  |
| 13-1*02     | 20*01 | CAASLAGNDYKLSF     | 20-1*05 | 2*01 | 2-7*01 | CSARDVRRIYEQYF     | 4.3  |
| 4*01        | 5*01  | CLVYRRALTF         | 29-1*01 | 1*01 | 1-1*01 | CSVGDGNTTEAFF      | 4.3  |
| 12-2*02     | 49*01 | CAVNTPIPTNTGQYF    | 29-1*01 | -    | 2-7*01 | CSVTRSYEQYF        | 4.3  |
| 41*01       | 58*01 | CAVPTSGYRLTF       | 9*03    | 2*02 | 2-5*01 | CSSSKPAAGNTQYF     | 4.3  |

**VK48**

| TRAV      | TRAJ  | CDR3α             | TRBV    | TRBD | TRBJ   | CDR3β            | %    |
|-----------|-------|-------------------|---------|------|--------|------------------|------|
| 12-1*01   | 28*01 | CVVNRLOSGAGSYQLTF | 2*01    | 2*01 | 2-7*01 | CASSEAGGYEQYF    | 11.1 |
| 4*01      | 9*01  | CLVGDIRHTGGFKTIF  | 2*01    | -    | 1-6*02 | CASSEDSPLHF      | 11.1 |
| 12-1*01   | 53*01 | CVVNTLNSGGSNYKLVF | 4-2*01  | 1*01 | 2-7*01 | CASSPTGGYEQYF    | 5.6  |
| 12-1*01   | 12*01 | CVVTVPPAMDSYKLVF  | 6-1*01  | 1*01 | 2-7*01 | CASSRKGGYEQYF    | 5.6  |
| 12-1*01   | 41*01 | CVVNNLADNSGYALNF  | 2*01    | 1*01 | 2-7*01 | CASSDQGYEQYF     | 5.6  |
| 12-1*01   | 33*01 | CVVNNLSDNSNYQLIW  | 25-1*01 | 1*01 | 2-7*01 | CASSEGGQGYEQYF   | 5.6  |
| 12-1*01   | 20*01 | CVVNCLEDDYKLSF    | 6-1*01  | 2*02 | 2-7*01 | CASSEGRGYEQYF    | 5.6  |
| 16*01     | 4*01  | CALSLSFGSYGNKLVF  | 4-1*01  | 1*01 | 2-7*01 | CASSQGGYEQYF     | 5.6  |
| 23/DV6*02 | 49*01 | CPAGGNQYF         | 6-1*01  | 1*01 | 2-7*01 | CASSEWGYEQYF     | 5.6  |
| 17*01     | 20*01 | CATDNDYKLSF       | 19*01   | 1*01 | 1-2*01 | CASSMRGQGYGYTF   | 5.6  |
| 20*02     | 4*01  | CAVQPSFSGSYGNKLVF | 2*01    | 1*01 | 2-7*01 | CASSEGGQPYEQYF   | 5.6  |
| 27*01     | 37*01 | RAGAGGGTGEFT      | 6-1*01  | 1*01 | 1-5*01 | CASSEWIGDNQPPHF  | 5.6  |
| 27*01     | 42*01 | CAASMGSSQGNLIF    | 11-2*01 | 1*01 | 2-4*01 | CASSLGPVLAKNIQYF | 5.6  |
| 14/DV4*02 | 29*01 | CAMRPNASNTPLVF    | 4-1*01  | 1*01 | 2-7*01 | CASSQGRGAAYEQYF  | 5.6  |
| 8-6*02    | 37*02 | CAVSDRANSTGKLVF   | 4-1*01  | 1*01 | 1-1*01 | CASSQVTGGWTEAFF  | 5.6  |
| 23/DV6*01 | 28*01 | CAASTPGAGSYQLTF   | 6-5*01  | 1*01 | 2-7*01 | CASSSSVQDIVEF    | 5.6  |
| 12-3*01   | 54*01 | CAMRAPGAQKLVF     | 9*02    | 2*01 | 2-7*01 | CASSVGPGLAAYEQYF | 5.6  |

**GV36**

| TRAV      | TRAJ  | CDR3α            | TRBV    | TRBD | TRBJ   | CDR3β            | %    |
|-----------|-------|------------------|---------|------|--------|------------------|------|
| 1-2*01    | 23*01 | CAVRDGTGGKLVF    | 13*01   | 1*01 | 2-1*01 | CASSFPNRNEQFF    | 10.0 |
| 12-1*01   | 26*01 | CVVNGRNYGNFVIF   | 4-1*01  | 2*01 | 2-7*01 | CASSQPGGYEQSF    | 5.0  |
| 12-2*02   | 33*01 | CAVNGLRKDSNYQLIW | 6-1*01  | 2*01 | 2-7*01 | CASSEGGGYEQYF    | 5.0  |
| 17*01     | 37*02 | CATHGSSNTYKLVF   | 7-3*01  | -    | 2-7*01 | CASSLFLAYEQYF    | 5.0  |
| 25*01     | 44*01 | CAGKTGTASKLTF    | 27*01   | 2*02 | 2-7*01 | CASSLGLRYEQYF    | 5.0  |
| 19*01     | 49*01 | CALWCGNQYF       | 27*01   | 1*01 | 2-1*01 | CASSNGEQFF       | 5.0  |
| 3*01      | 3*01  | CAVRDDYSSASKIIF  | 19*01   | 1*01 | 2-3*01 | CASRDREDTQYF     | 5.0  |
| 10*01     | 43*01 | CVVNPYNNDMRF     | 9*01    | 2*02 | 2-7*01 | CASSAGLAGAYEQYF  | 5.0  |
| 5*01      | 31*01 | CAETSHNNARLDMF   | 2*01    | 1*01 | 2-3*01 | CASSSTGTDTQYF    | 5.0  |
| 13-1*02   | 11*01 | CAPMNSGYSTLTF    | 7-9*01  | 1*01 | 2-6*01 | CASSHLWVSGANVLF  | 5.0  |
| 24*01     | 36*01 | CARPGFRQTGANLFF  | 3-1*01  | 1*01 | 2-1*01 | CASSQDMDPYNEQFF  | 5.0  |
| 10*01     | 41*01 | VVSGWSGYALF      | 6-2*01  | 1*01 | 2-7*01 | CASSYETGSSYEQYF  | 5.0  |
| 41*01     | 45*01 | CASPGNSGGGADGLTF | 25-1*01 | 1*01 | 2-6*01 | CASTEGDLVTF      | 5.0  |
| 1-2*01    | 30*01 | CAPTSDDKIIIF     | 15*02   | 1*01 | 1-2*01 | CATSPGGSGGYTF    | 5.0  |
| 12-2*02   | 35*01 | CAVNHGLGGFGNVLHC | 24-1*01 | 2*01 | 1-1*01 | CATVSGNTEAFF     | 5.0  |
| 14/DV4*02 | 33*01 | CAMREGMDSNYQLIW  | 7-9*01  | 1*01 | 1-6*01 | CAVQSGYSNPLHF    | 5.0  |
| 3*01      | 37*01 | VRCESSQGRSTGQLIF | 30*01   | 1*01 | 2-5*01 | CASSVGRNGDEQYF   | 5.0  |
| 35*03     | 49*01 | CAGQHGQYF        | 29-1*01 | 2*02 | 2-1*01 | CSVEGTSGRSYNEQFF | 5.0  |
| 8-2*03    | 8*01  | CVVSDKGFQKLVF    | 2*01    | 2*02 | 2-2*01 | VPSALLAGGPGSCF   | 5.0  |

**VKU7**

| TRAV      | TRAJ  | CDR3α             | TRBV    | TRBD | TRBJ   | CDR3β            | %   |
|-----------|-------|-------------------|---------|------|--------|------------------|-----|
| 13-2*01   | 11*01 | CAEIALMNSGYSTLTF  | 2*01    | 1*01 | 2-7*01 | CASSENRYGYEQYF   | 4.0 |
| 12-1*02   | 33*01 | CVVYGLIDGNQYTFW   | 4-1*01  | 1*01 | 2-7*01 | CASSRTGGYEQYF    | 4.0 |
| 2*01      | 6*01  | CAAPLHSGNTGKLVF   | 6-6*01  | 1*01 | 2-7*01 | CASSVGGQGYEQYF   | 4.0 |
| 12-1*01   | 37*01 | CVVNNLSDNSNYQLIW  | 2*01    | 1*01 | 2-7*01 | CASSVGGYEQYF     | 4.0 |
| 12-1*01   | 33*01 | CVVNNALRDSNYQLIW  | 6-1*01  | 1*01 | 2-7*01 | CASSGGQGYEQYF    | 4.0 |
| 21*02     | 4*01  | CGACHMFGSYGNKLVF  | 5-4*01  | 1*01 | 2-7*01 | CASSLJGTYEQYF    | 4.0 |
| 6*02      | 49*01 | CVIIPGTQYF        | 2*01    | 1*01 | 2-7*01 | CASRGQGGNEQYF    | 4.0 |
| 8-3*01    | 48*01 | CAVRNFGNEKLVF     | 9*01    | 1*01 | 1-1*01 | CASSAPAGTEAFF    | 4.0 |
| 8-1*01    | 22*01 | CLLLLRCGTQLIF     | 6-6*01  | 1*01 | 2-5*01 | CASSDATTQETQYF   | 4.0 |
| 8-4*01    | 31*01 | CAVSETVNNARLDMF   | 25-1*01 | 2*01 | 2-5*01 | CASSEWGGQETQYF   | 4.0 |
| 3*01      | 15*01 | CAVRERDQAGTALIF   | 9*01    | 2*01 | 2-5*01 | CASSGTGGTQYF     | 4.0 |
| 3*01      | 3*01  | CAVRDPGYSSASKIIF  | 19*01   | 2*01 | 2-3*01 | CASSIDLGDYTF     | 4.0 |
| 14/DV4*02 | 53*01 | CAMRPNSSGGSNYKLVF | 11-3*01 | 2*01 | 2-7*01 | CASSLGPVGLSYEQYF | 4.0 |
| 8-1*01    | 37*01 | CAVNSGNTGKLVF     | 11-2*01 | 2*01 | 2-7*01 | CASSLPGGQYEQYF   | 4.0 |
| 17*01     | 23*01 | CATDDNQGGKLVF     | 12-3*01 | -    | 2-7*01 | CASSLSYEQYF      | 4.0 |
| 3*01      | 29*01 | CAVRDIIPGNTPLVF   | 7-9*03  | 2*02 | 2-7*01 | CASSLTSGSSYEQYF  | 4.0 |
| 8-4*01    | 44*01 | CAVRLTYGTASKLTF   | 14*02   | 2*02 | 1-4*01 | CASSQGEVNRNEKLVF | 4.0 |
|           |       |                   |         |      |        |                  |     |

GV38

| TRAV      | TRAJ  | CDR3α              | TRBV    | TRBD | TRBJ   | CDR3β             | %   |
|-----------|-------|--------------------|---------|------|--------|-------------------|-----|
| 12-2*02   | 32*02 | CAVELGGGAINKLI F   | 5-4*01  | 2*01 | 2-5*01 | CASSPRGGQETQY F   | 6.9 |
| 13-1*02   | 12*01 | CAASWSSYKLI F      | 12-4*01 | 1*01 | 2-3*01 | CASSRPETGYDTQY F  | 6.9 |
| 12-1*01   | 28*01 | CVVNLISYGAGSYQLTF  | 6-1*01  | 1*01 | 2-7*01 | CASSSEAKGYEQY F   | 3.4 |
| 12-1*01   | 28*01 | CVVNVAAAGSYQLTF    | 5-4*01  | 1*01 | 2-7*01 | CASSIGQGYEQY F    | 3.4 |
| 12-1*01   | 28*01 | CVVILLISGAGSYQLTF  | 5-4*01  | -    | 1-3*01 | CASSLFMDTIY F     | 3.4 |
| 12-1*01   | 48*01 | CVVTRISNFGNEKLI F  | 10-2*01 | 1*01 | 2-5*01 | CASTKGMETQY F     | 3.4 |
| 12-3*01   | 18*01 | CLALADRGSTLGRLY F  | 6-2*01  | 1*01 | 2-7*01 | CASSTGQGYEQY F    | 3.4 |
| 39-3*01   | 53*01 | CAVDGNSGGSNYKLI F  | 7-2*01  | 2*01 | 2-7*01 | CASSLGLTYEQY F    | 3.4 |
| 8-3*02    | 49*01 | CAVGYSHLRITGNQF YF | 6-4*01  | 2*02 | 2-7*01 | CASSEAGGYEQY F    | 3.4 |
| 17*01     | 11*01 | CATDSPYQLTF        | 4-3*01  | 1*01 | 1-2*01 | CASHKFRGANYGTF    | 3.4 |
| 17*01     | 54*01 | CATDVRTQKLV F      | 2*01    | 2*01 | 2-7*01 | CASRPWGTSDYEQY F  | 3.4 |
| 14/DV4*01 | 40*01 | CAMRSRGTYYKIF      | 9*01    | 1*01 | 2-3*01 | CASSAPRGQSTDTQY F | 3.4 |
| 8-3*02    | 53*01 | CAVDGNSGGSNYKLI F  | 11-3*04 | 2*01 | 2-1*01 | CASSDLGASNEQFF    | 3.4 |
| 14/DV4*01 | 30*01 | CAMRELRDDKIF       | 25-1*01 | 1*01 | 1-2*01 | CASSESTVYGYTF     | 3.4 |
| 21*01     | 49*01 | CAVEANTGNQY F      | 6-2*01  | -    | 2-7*01 | CASSHAYEQY F      | 3.4 |
| 19*01     | 3*01  | CARAYSSASKIIF      | 13*01   | 1*01 | 2-1*01 | CASSLRDSYNEQFF    | 3.4 |
| 17*01     | 42*01 | CATFYGGGKLI F      | 27*01   | 1*01 | 1-2*01 | CASSLSDRGANYGTF   | 3.4 |
| 1-1*01    | 40*01 | CAARTTSPTYKIF      | 19*01   | 2*01 | 1-2*01 | CASSMEGGQFPYGYT F | 3.4 |
| 12-3*01   | 5*01  | CATNSMDTGRRAITF    | 6-5*01  | 1*01 | 2-3*01 | CASSPWTGNTDQY F   | 3.4 |
| 13-1*02   | 17*01 | CAASMEAAGNRKLI F   | 4-1*01  | 2*01 | 2-1*01 | CASSQQLGANNQY F   | 3.4 |
| 8-1*02    | 16*02 | FRAPCSCKDDHKLI F   | 4-1*01  | 1*01 | 2-2*01 | CASSQGVVLQGLLF    | 3.4 |
| 13-2*01   | 52*01 | CAESPNAGGTRYGKLI F | 4-1*01  | 2*02 | 2-1*01 | CASSQWSSSNYEQFF   | 3.4 |
| 8-1*01    | 39*01 | CAVTLNAGNMLIF      | 5-5*02  | 1*01 | 2-7*01 | CASSRTQYEQY F     | 3.4 |
| 12-2*02   | 28*01 | CAVMSYSGAGSYQLTF   | 9*01    | 2*01 | 2-7*01 | CASSVASGAYEQY F   | 3.4 |
| 27*01     | 38*01 | CAGPHAGNRKLI F     | 6-6*01  | 1*01 | 1-5*01 | CASSYLGGFNSQPQH F | 3.4 |
| 14/DV4*02 | 24*03 | CAMREREATSDWGKQ F  | 30*01   | 1*01 | 1-4*01 | CAWSPPGPPNEKLI F  | 3.4 |
| 13-1*02   | 8*01  | CAASRVDTFGQKLV F   | 20-1*01 | 2*01 | 2-3*01 | CSARSPVITDTQY F   | 3.4 |

GV42

| TRAV        | TRAJ  | CDR3α              | TRBV    | TRBD | TRBJ   | CDR3β                | %   |
|-------------|-------|--------------------|---------|------|--------|----------------------|-----|
| 5*01        | 24*02 | CAEVVNDSWGKLI F    | 2*01    | 1*01 | 2-7*01 | CASSESGGYEQY F       | 4.9 |
| 19*01       | 7*01  | CALSEATGGGNRLA F   | 5-5*02  | 1*01 | 1-5*01 | CASSLGNWQPQHF        | 3.3 |
| 12-1*01     | 9*01  | CVVNMWGTGDFKI F    | 27*01   | 1*01 | 2-1*01 | CASSGALNEQFF         | 3.3 |
| 12-1*01     | 12*01 | CVVNLMDSSYKLI F    | 2*01    | 1*01 | 2-4*01 | CASSEGGQYIYQY F      | 1.6 |
| 12-1*01     | 43*01 | CVVTFVPNDMRF       | 6-1*01  | 1*01 | 2-7*01 | CASSEGGQSYEQY F      | 1.6 |
| 12-1*01     | 12*01 | CVVNLADSSYKLI F    | 2*01    | 1*01 | 2-7*01 | CASSAGQGYEQY F       | 1.6 |
| 12-1*01     | 12*01 | CVVNIPLDSSYKLI F   | 2*01    | 2*01 | 2-7*01 | CASSATAGYEQY F       | 1.6 |
| 12-1*01     | 40*01 | CVVSPFPSSGTYKIF    | 2*01    | 1*01 | 2-7*01 | CASSDFQGYEQY F       | 1.6 |
| 12-1*01     | 42*01 | CVVTPNYGGSGNLI L   | 2*01    | 1*01 | 2-7*01 | CASSEYMSYEQY F       | 1.6 |
| 12-1*01     | 34*01 | CVVQGDTKLI F       | 6-1*01  | 1*01 | 2-7*01 | CASSDWVGYEQY F       | 1.6 |
| 12-2*01     | 53*01 | CAVNLADSSYKLI F    | 6-1*01  | 1*01 | 2-7*01 | CASSHESQGYEQY F      | 1.6 |
| 12-1*01     | 12*01 | CVVNLMDSSYKLI F    | 6-1*01  | 2*01 | 2-7*01 | CASSVARGYEQY F       | 1.6 |
| 12-2*01     | 28*01 | CASSRPPSSGAGSYQLTF | 6-1*01  | 1*01 | 2-7*01 | CASSRWGQGYEQY F      | 1.6 |
| 12-1*01     | 20*01 | CVVSGDYKLI F       | 2*01    | 2*01 | 2-7*01 | CASSEFAGKSSYEQY F    | 1.6 |
| 12-1*01     | 5*01  | CVVNIPTGRRAITF     | 4-1*01  | 1*01 | 2-7*01 | CASSLQDQYEQY F       | 1.6 |
| 12-1*01     | 42*01 | CVVTRWMDSSYKLI F   | 5-6*01  | 2*01 | 2-1*01 | CASSHFWGAGNEQFF      | 1.6 |
| 12-1*01     | 8*01  | CVVNGRWNANTGFKLV F | 9*01    | 2*01 | 2-7*01 | CASSVAVTSVYEQY F     | 1.6 |
| 38-2/DV8*01 | 39*01 | CAYHNANMLTF        | 11-2*01 | 1*01 | 2-7*01 | CASSRWQYEQY F        | 1.6 |
| 20*02       | 10*01 | CAVQTGGGNKLI F     | 6-4*01  | 2*01 | 1-2*01 | CASSDGLGYTF          | 1.6 |
| 34*01       | 21*01 | CGAASPQKFI YF      | 2*01    | 1*01 | 2-7*01 | CASSEYTPILGHEQY F    | 1.6 |
| 8-3*01      | 42*01 | CAVGIYGGSGNLI F    | 12-4*01 | 2*01 | 2-1*01 | CASSHFWGAGNEQFF      | 1.6 |
| 4*01        | 43*01 | CLVGGSDMRF         | 7-9*03  | 1*01 | 1-1*01 | CASSFRGTAEFF         | 1.6 |
| 16*01       | 49*01 | CALTSNSQYF         | 4-2*01  | 2*02 | 2-1*01 | CASSHMSSGYEQY F      | 1.6 |
| 8-4*01      | 22*01 | CAVSDVYGSARQLTF    | 19*01   | 2*01 | 2-3*01 | CASSIGGRTTDTQY F     | 1.6 |
| 38-1*03     | 36*01 | CAPILGTANNLI F     | 19*01   | 2*02 | 2-5*01 | CASSILSGRTGGEQY F    | 1.6 |
| 8-3*01      | 10*01 | CAVRWMDSSYKLI F    | 7-9*03  | 1*01 | 2-3*01 | CASSLALRQPDQY F      | 1.6 |
| 41*01       | 32*02 | CAVRPGYGGANKLI F   | 5-4*01  | 2*01 | 2-3*01 | CASSLALRQPDQY F      | 1.6 |
| 24*01       | 6*01  | CASRRLSGGSYIPTF    | 2*01    | 1*01 | 2-3*01 | CASSLWGTHTDQY F      | 1.6 |
| 14/DV4*01   | 39*01 | CSMIEDNTDTMLTF     | 7-9*03  | 2*02 | 1-1*01 | CASSLGGKVNTEAFF      | 1.6 |
| 9-2*04      | 49*01 | CAPPNTGNQY F       | 13*01   | 1*01 | 2-6*01 | CASSLGGQGGYSGAN VLTF | 1.6 |
| 16*01       | 10*01 | CARRGGNKLI F       | 7-3*01  | 1*01 | 2-6*01 | CASSLGGQGGYSGAN VLTF | 1.6 |
| 8-6*02      | 9*01  | CAVDTTGGKTI F      | 7-9*03  | 1*01 | 1-2*01 | CASSLTRLRPLKQGLYGYTF | 1.6 |
| 20*02       | 39*01 | CAVPPNNAGNMLTF     | 4-1*01  | 2*02 | 2-7*01 | CASSQDFSSGYEQY F     | 1.6 |
| 8-1*01      | 5*01  | CAVFPWAGRRALTF     | 14*01   | 2*02 | 1-1*01 | CASSQGGDTEAFF        | 1.6 |
| 12-3*01     | 34*01 | CAMSHYNTDKLI F     | 5-1*01  | -    | 2-5*01 | CASSSEETQY F         | 1.6 |
| 21*02       | 18*01 | CAVQGRGSTLGRLY F   | 9*01    | 1*01 | 2-5*01 | CASSSEGVGTEQY F      | 1.6 |
| 8-4*03      | 49*01 | CAVTFNSQYF         | 7-9*03  | 2*01 | 1-1*01 | CASSRGTATGTEAFF      | 1.6 |
| 22*01       | 12*01 | CAVWMDSSYKLI F     | 9*01    | 1*01 | 1-1*01 | CASSVAGVTEAFF        | 1.6 |
| 12-2*02     | 35*01 | CANMPPPIFGNVLI H C | 9*01    | 2*01 | 2-1*01 | CASSVGPVGNQY F       | 1.6 |
| 14/DV4*02   | 42*01 | CALVRYIYGGSGNLI F  | 6-4*01  | 2*02 | 2-1*01 | CASSVSGSEGHQY F      | 1.6 |
| 29/DV5*04   | 43*01 | CAATWGD MRF        | 5-1*01  | 2*01 | 2-3*01 | CASSYWGSDTQY F       | 1.6 |
| 13-1*02     | 21*01 | CAAGS*LYNFKFI YF   | 4-1*01  | 1*01 | 1-1*01 | CAS*TRAGGTEAFF       | 1.6 |
| 13-1*02     | 43*01 | CAASMRDND MRF      | 15*02   | 1*01 | 2-7*01 | CATSKESGAPYEQY F     | 1.6 |
| 3*01        | 49*01 | CAVRDTGNQY F       | 30*01   | 1*01 | 1-2*01 | CANWNLGTYGTF         | 1.6 |
| 5*01        | 40*01 | CAVTSYTYKIF        | 30*01   | 1*01 | 2-1*01 | CAS*PLKGRBQF         | 1.6 |
| 12-3*01     | 53*01 | CAIGGSNYKLI F      | 20-1*01 | 2*02 | 2-1*01 | CASHGPTSGSFI EQY F   | 1.6 |
| 8-4*01      | 10*01 | CAVTLHGGGNKLI F    | 20-1*01 | 2*02 | 2-3*01 | CSAPTEBRTDTQY F      | 1.6 |
| 22*01       | 20*01 | CAVERQ*TS*SA F     | 20-1*01 | 1*01 | 2-1*01 | CSARAGET*SS*YNEQFF   | 1.6 |
| 19*01       | 13*02 | CALSERNSGGYKQVTF   | 20-1*01 | 1*01 | 2-3*01 | CSARARQDHTDTQY F     | 1.6 |
| 38-2/DV8*01 | 30*01 | CAYRSARDKIF        | 20-1*01 | 2*01 | 2-7*01 | CSAREQDYEQY F        | 1.6 |
| 13-2*01     | 39*01 | CAENSYNAGNMLTF     | 20-1*01 | 2*01 | 2-1*01 | CSARPLAASSYNEQFF     | 1.6 |
| 12-2*01     | 45*01 | CAVNIIGSGGGADGLTF  | 29-1*01 | 1*01 | 2-3*01 | CSAWDRFTDTQY F       | 1.6 |
| 38-1*03     | 39*01 | CAPMKPNAGNMLTF     | 20-1*01 | 1*01 | 1-3*01 | CSGMDGSSGNTIY F      | 1.6 |
| 19*01       | 41*01 | CALSTNSGYALNF      | 29-1*01 | 2*02 | 2-1*01 | CSVGLAGWEQFF         | 1.6 |
| 17*01       | 3*01  | CATHLRGSSASKIIF    | 29-1*01 | 2*01 | 2-5*01 | CSVVLAEAEETQY F      | 1.6 |
| 12-2*01     | 53*01 | CAVNDSSGNSYKLI F   | 20-1*01 | 1*01 | 2-7*01 | CSVSISSYEQY F        | 1.6 |
| 4*01        | 9*01  | CLTPYTGFKTI F      | 28*01   | 1*01 | 1-6*01 | CASIPYQDRGLFEMNSPLHF | 1.6 |

GV41

| TRAV        | TRAJ  | CDR3α                | TRBV    | TRBD | TRBJ   | CDR3β              | %   |
|-------------|-------|----------------------|---------|------|--------|--------------------|-----|
| 12-1*01     | 6*01  | CVVNWEGGSSYIPTF      | 20-1*01 | 2*01 | 2-3*01 | CSARDRQADD*DTQY F  | 5.6 |
| 21*01       | 18*01 | CAVRSDRGSTLGRLY F    | 11-2*03 | 1*01 | 2-7*01 | CASSLQDQYEQY F     | 5.6 |
| 14/DV4*02   | 11*01 | CAPFPFSGYSILTF       | 27*01   | 1*01 | 2-7*01 | CASSLWQGYEQY F     | 5.6 |
| 12-2*01     | 42*01 | CAVLNYGGSGNLI F      | 10-3*03 | 2*01 | 2-7*01 | CAISEGRAYEQY F     | 5.6 |
| 4*01        | 42*01 | CLVIYGGSGNLI F       | 4-1*01  | 2*02 | 2-7*01 | CASSQGESYEQY F     | 5.6 |
| 4*01        | 22*01 | CLVWGSARQLTF         | 2*01    | 1*01 | 2-7*01 | CASSEGTGGYEQY F    | 5.6 |
| 4*01        | 10*01 | CLVGD MNRFTGGGNKLI F | 5-6*01  | 1*01 | 2-7*01 | CASSLGGRYEQY F     | 5.6 |
| 3*01        | 47*02 | CAVRDSSYGNKLI F      | 5-6*01  | 2*02 | 2-3*01 | CASSLEVGK*WTDQY F  | 5.6 |
| 8-6*01      | 4*01  | CATSGYKNLI F         | 28*01   | 1*01 | 1-1*01 | CASSPRTGWTEAFF     | 5.6 |
| 17*01       | 15*01 | CATGLNQAGTALIF       | 29-1*01 | 2*02 | 1-3*01 | CSVEVTPAGEGGNTI YF | 5.6 |
| 38-2/DV8*01 | 41*01 | QAYRSTGYAETL         | 29-1*01 | 1*01 | 2-7*01 | CSVVGVRPDEQY F     | 5.6 |
| 19*01       | 29*01 | CALSESNSGNTPLVF      | 24-1*01 | 1*01 | 2-7*01 | CATSAVGSHSNEQY F   | 5.6 |
| 3*01        | 23*01 | CAVRFPGNQKLI F       | 28*01   | 2*01 | 2-1*01 | CASRPLAGDNEQFF     | 5.6 |
| 21*01       | 44*01 | PQAGTASKLI F         | 20-1*01 | 1*01 | 2-7*01 | CSASRLGTGSYEQY F   | 5.6 |
| 8-3*02      | 41*01 | CAVGLSAGYALNF        | 19*01   | 1*01 | 2-7*01 | CASSIERRTSDYEQY F  | 5.6 |
| 6*02        | 43*01 | CALDNNND MRF         | 28*01   | 2*01 | 2-7*01 | CASRLRDWDEQY F     | 5.6 |
| 4*01        | 5*01  | CLVGDTRPQDTGRRAITF   | 4-2*01  | 2*01 | 2-3*01 | CASSQGGSDTQY F     | 5.6 |
| 29/DV5*04   | 20*01 | CAARLSNDYKLI F       | 4-1*01  | 1*01 | 2-1*01 | CASWDANRNEQFF      | 5.6 |

KK-008

| TRAV    | TRAJ  | CDR3α             | TRBV    | TRBD | TRBJ   | CDR3β              | %    |
|---------|-------|-------------------|---------|------|--------|--------------------|------|
| 12-1*01 | 41*01 | CVVNLNRNSGYALNF   | 6-1*01  | 2*01 | 2-7*01 | CASSESGGYEQY F     | 22.5 |
| 26-1*02 | 23*01 | CIGAYNQGGKLI F    | 2*01    | 2*01 | 2-7*01 | CASSENRYGYEQY F    | 9.8  |
| 12-1*01 | 12*01 | CVVNIIMDSSYKLI F  | 6-4*01  | 2*02 | 2-7*01 | CASSEEGGYEQY F     | 8.8  |
| 12-1*01 | 33*01 | CVVNEYRSSNYQLIW   | 5-4*01  | 1*01 | 2-7*01 | CASSLGGRYEQY F     | 8.8  |
| 12-1*01 | 12*01 | CVVNLMDSSYKLI F   | 2*01    | 1*01 | 2-7*01 | CASSVSGYEQY F      | 6.9  |
| 1-1*01  | 30*01 | CAVRGKNRDDKIF     | 20-1*01 | 1*01 | 2-3*01 | CSARPRDWLGT*DTQY F | 5.9  |
| 12-1*01 | 12*01 | CVVNLMDSSYKLI F   | 4-1*01  | 1*01 | 2-1*01 | CASD*TGQYEQY F     | 4.9  |
| 12-1*01 | 54*01 | CVVNTPIQGAQKLI F  | 2*01    | 1*01 | 2-7*01 | CASSENKDPNSC       | 4.9  |
| 12-1*01 | 33*01 | CVVIRGDSNHQLTW    | 7-3*01  | 1*01 | 2-7*01 | CASSYQGYEQY F      | 3.9  |
| 12-1*01 | 28*01 | CVVNRLAGSYQLTF    | 7-2*02  | 1*01 | 2-7*01 | CASSSGQGYEQY F     | 3.9  |
| 38-1*01 | 40*01 | CAFFLEGTYKIF      | 20-1*01 | 2*02 | 2-7*01 | CSVGASGSYEQY F     | 3.9  |
| 12-1*01 | 12*01 | CVVNRMDSSYKLI F   | 10-3*03 | 1*01 | 2-7*01 | CAISEQQGYEQY F     | 3.9  |
| 24*01   | 53*01 | CAFPVGGSNYKLI F   | 20-1*01 | 2*01 | 2-7*01 | CSARDISGGQYEQY F   | 3.9  |
| 26-1*02 | 37*02 | CIVMGSSNTGKLI F   | 2*01    | 1*01 | 2-7*01 | CASSEFRTYEQY F     | 2.9  |
| 12-1*01 | 28*01 | CVVNIHSGAGSYQLTF  | 5-4*01  | 1*01 | 2-7*01 | CASSIGQGYEQY F     | 2.0  |
| 12-1*01 | 28*01 | CVVKNHSGAGSYQLTF  | 5-4*01  | 1*01 | 2-7*01 | CASSQGYEQY F       | 2.0  |
| 20*02   | 57*01 | CVRYLTPQGGSEKLI F | 2*01    | 1*01 | 2-7*01 | CASSEFGYEQY F      | 1.0  |

Supplemental Figure S3. TCR pairings of NF9 specific T-cells from convalescent donors. Variable (V), joining (J), diversity (D) and CDR3 characteristics of NF9 specific TCR pairs. V-J genes colored according to circus plots used elsewhere in the study. The frequency of the TCR pairs are displayed. CDR3β motif CASSX<sup>3</sup>GYEQYF, and motif-like CDR3s CASSX<sup>2-8</sup>(GYEQYF), are indicated.

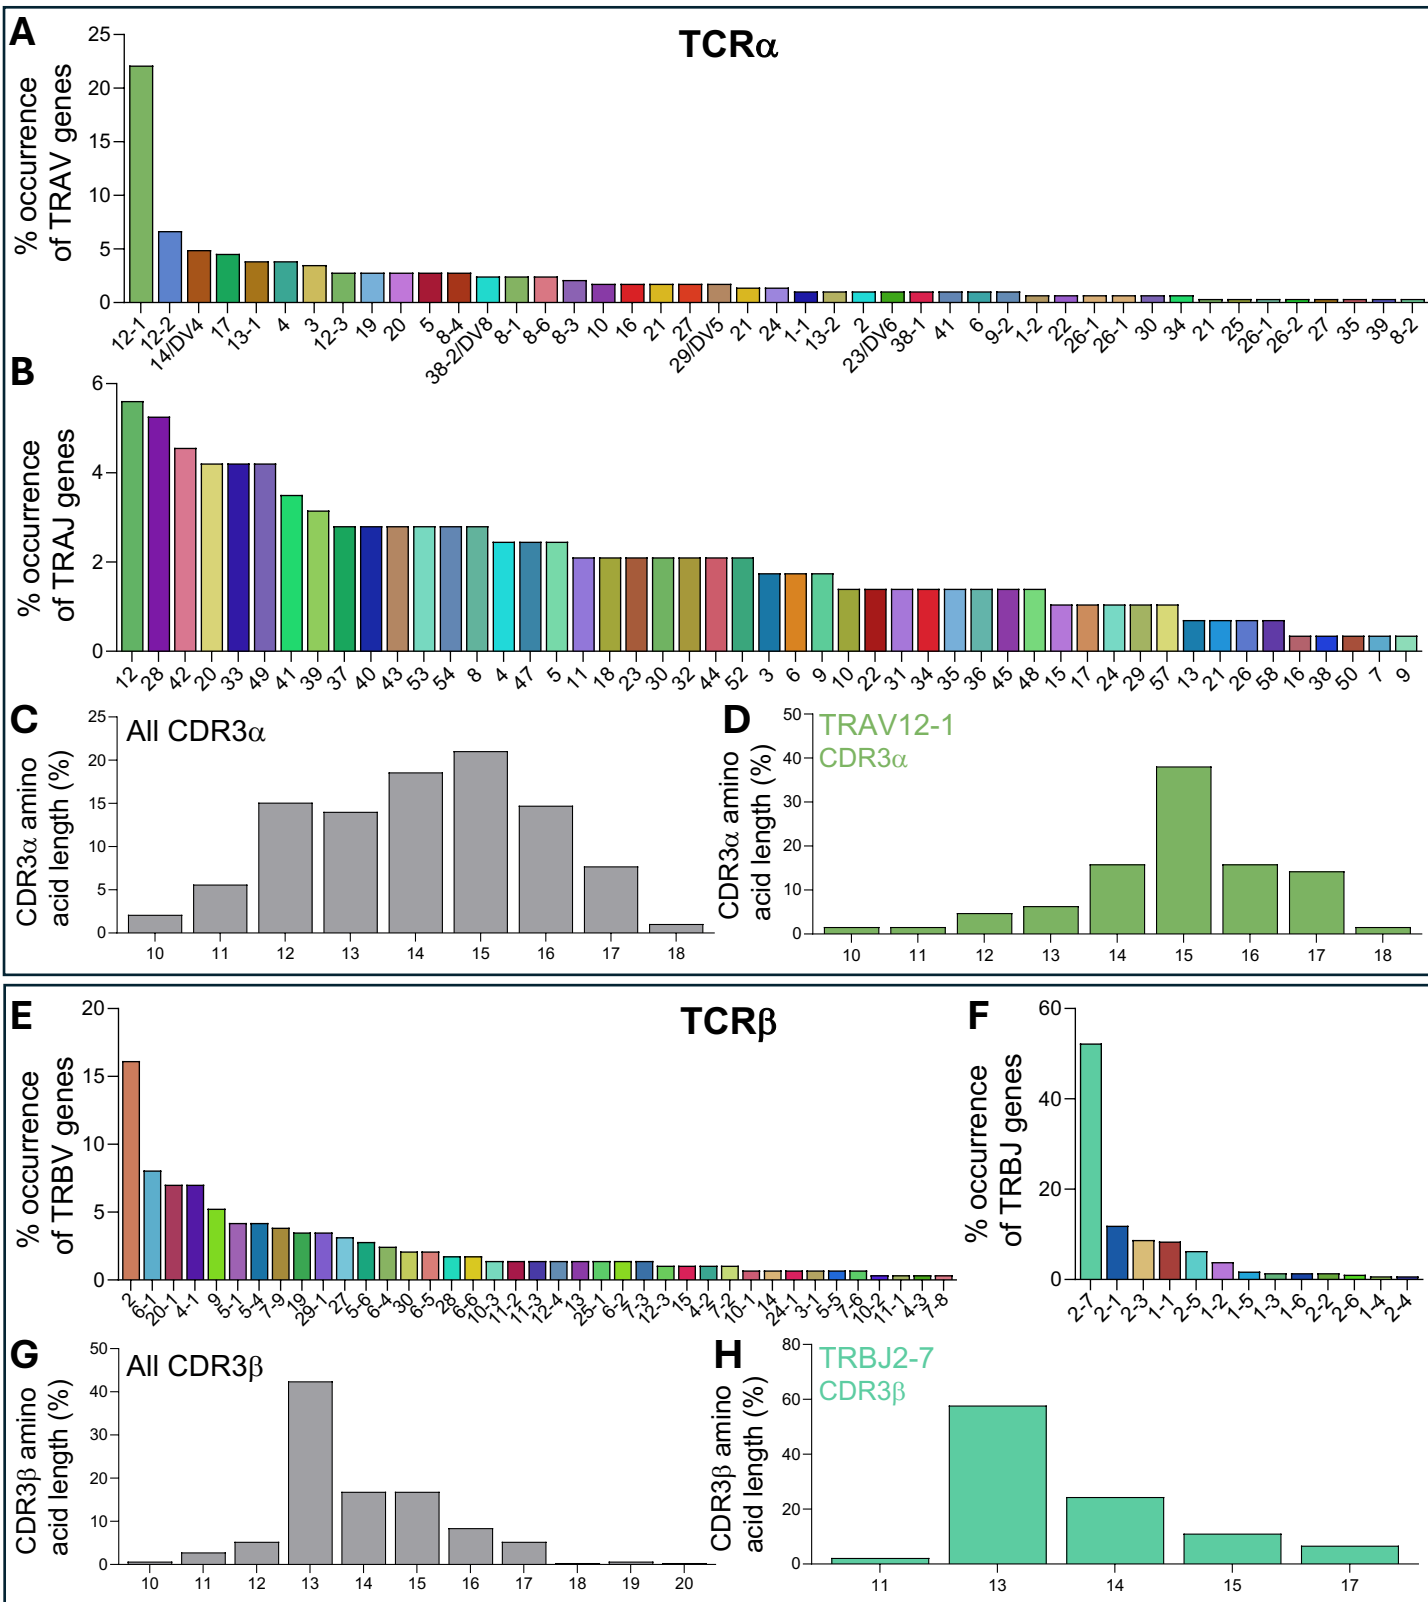

**Supplemental Figure S4. TCR $\alpha$  and TCR $\beta$  characteristics of NF9-specific T-cell responses in vaccinated and convalescent donors. (A) TCR $\alpha$  V-gene usage. (B) TCR $\alpha$  J-gene usage. (C) CDR3 $\alpha$  length. (D) CDR3 $\alpha$  length of TRAV12-1 containing CDR3 $\alpha$ . (E) TCR $\beta$  V-gene usage. (F) TCR $\beta$  J-gene usage. (G) CDR3 $\beta$  length. (H) CDR3 $\beta$  length of TRBJ2-7 containing CDR3 $\alpha$ .**

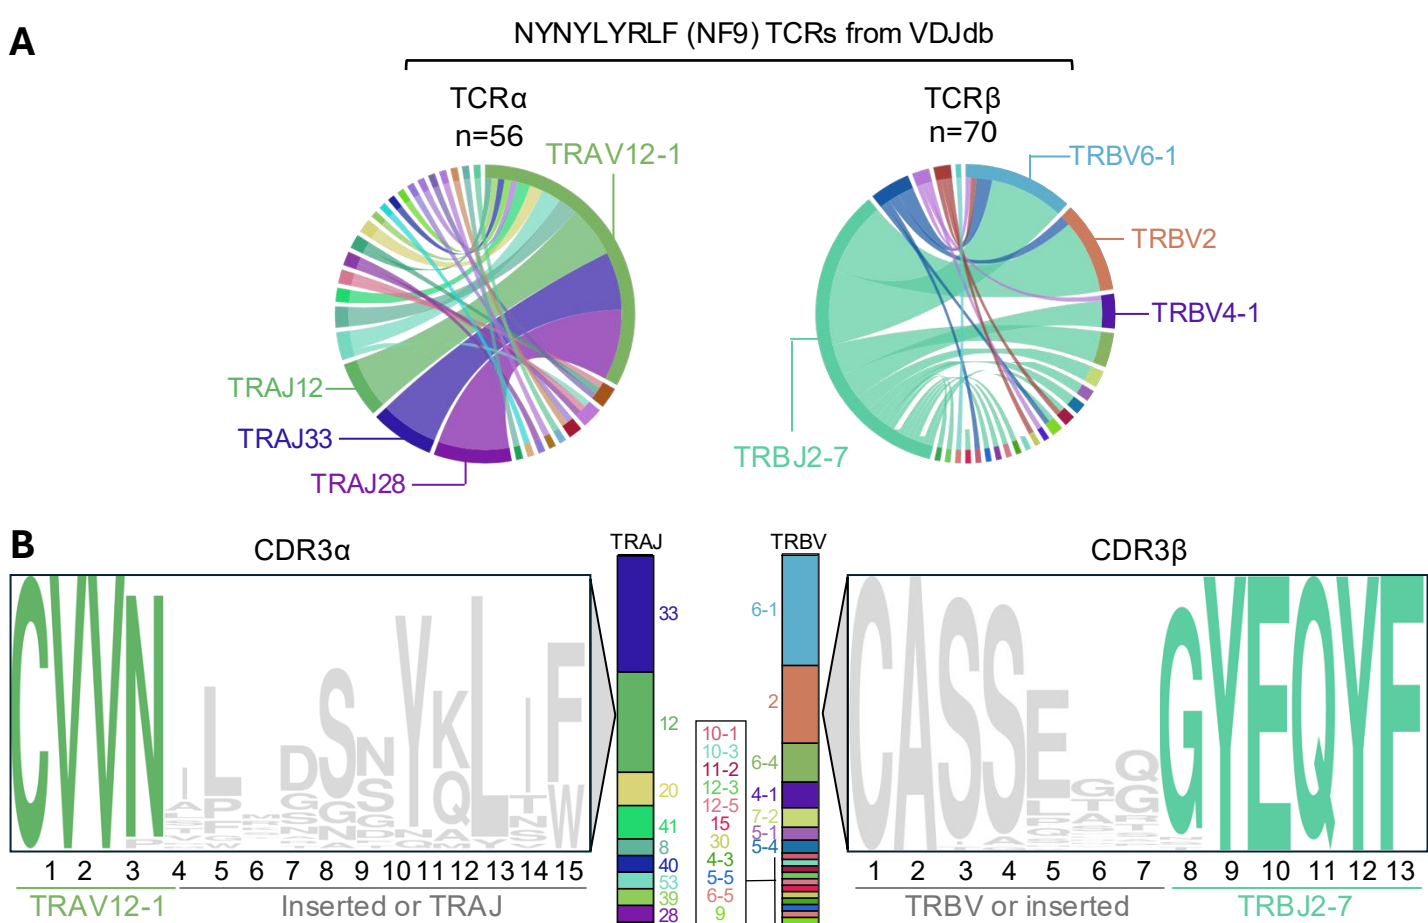

**Supplemental Figure S5. Clonotypic analysis of NYNYLYRLF-containing CDR3 sequences from VDJdb.** Data taken from VDJdb for HLA-A\*24:02 NYNYLYRLF specific TCRs including CDR3s with TRAV-TRAJ (56 chains) and TRBV-TRBJ (70 chains) gene usage. **(A)** Circos plots show the proportion of TRAJ or TRBJ genes on the left and TRAV or TRBV genes on the right, with the size of the arcs corresponding to relative frequency of the genes. Ribbons between the arcs represents V-J pairings. **(B)** Logo plots of CDR3 $\alpha$  (left) and CDR3 $\beta$  (right) from VDJdb TCRs in **(A)**. CDR3 $\alpha$ : based on TRAV12-1 (most prevalent TRAV) of 15 amino acids in length. CDR3 $\beta$  motif: based on TRBJ2-7 and 13 amino acids in length. The multiple TRAJ and TRBV chains that contribute to the CDR3 motifs are shown in central bars, where they are ordered from highest to lowest frequency.

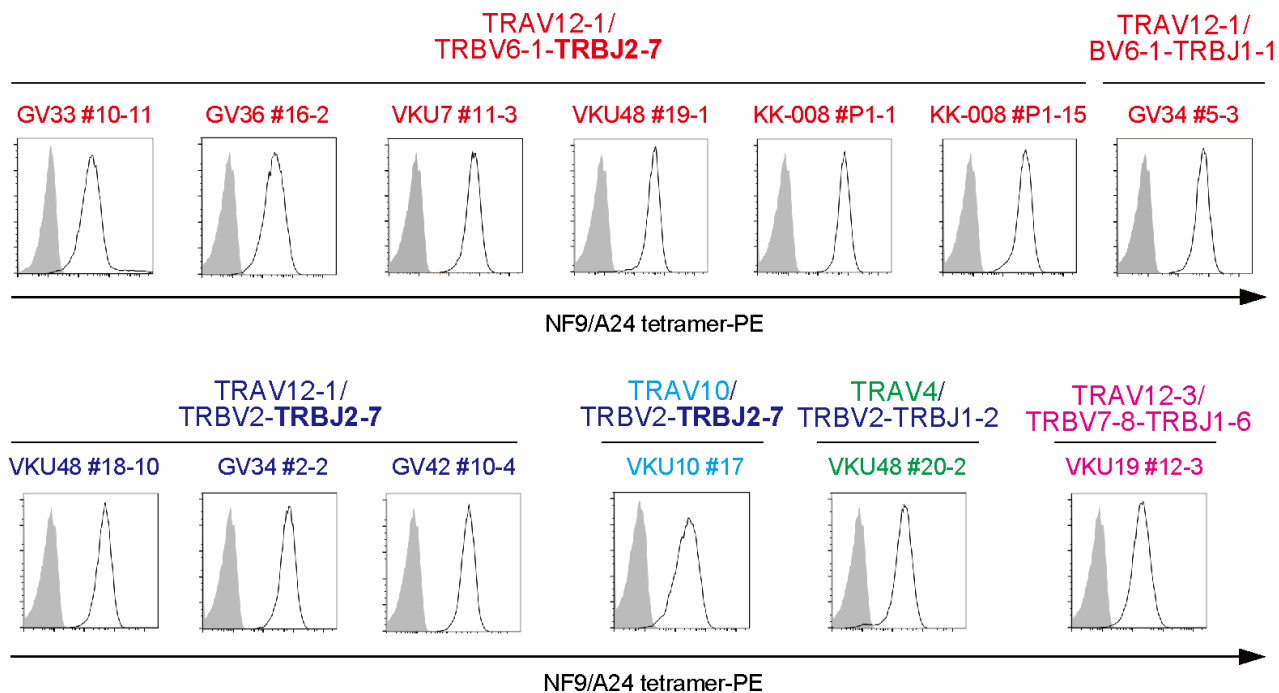

**Supplemental Figure S6. A24/NF9 tetramer staining of TCR-transduced Jurkat cells. A** Jurkat cells alone (shaded histogram) or those expressing A24/NF9-specific TCRs (GV33 #10-11, GV34 #5-3, GV36 #16-2, VKU7 #11-3, VKU48 #19-1, KK-008 #P1-1, and KK-008 #P1-15, VKU48 #18-10, GV34 #2-2, GV42 #10-4, VKU #20-2, VKU #17 and VKU #12-3) (open histogram) were stained with anti-CD3 mAb and A24/NF9 tetramer and then analyzed by flow cytometry.

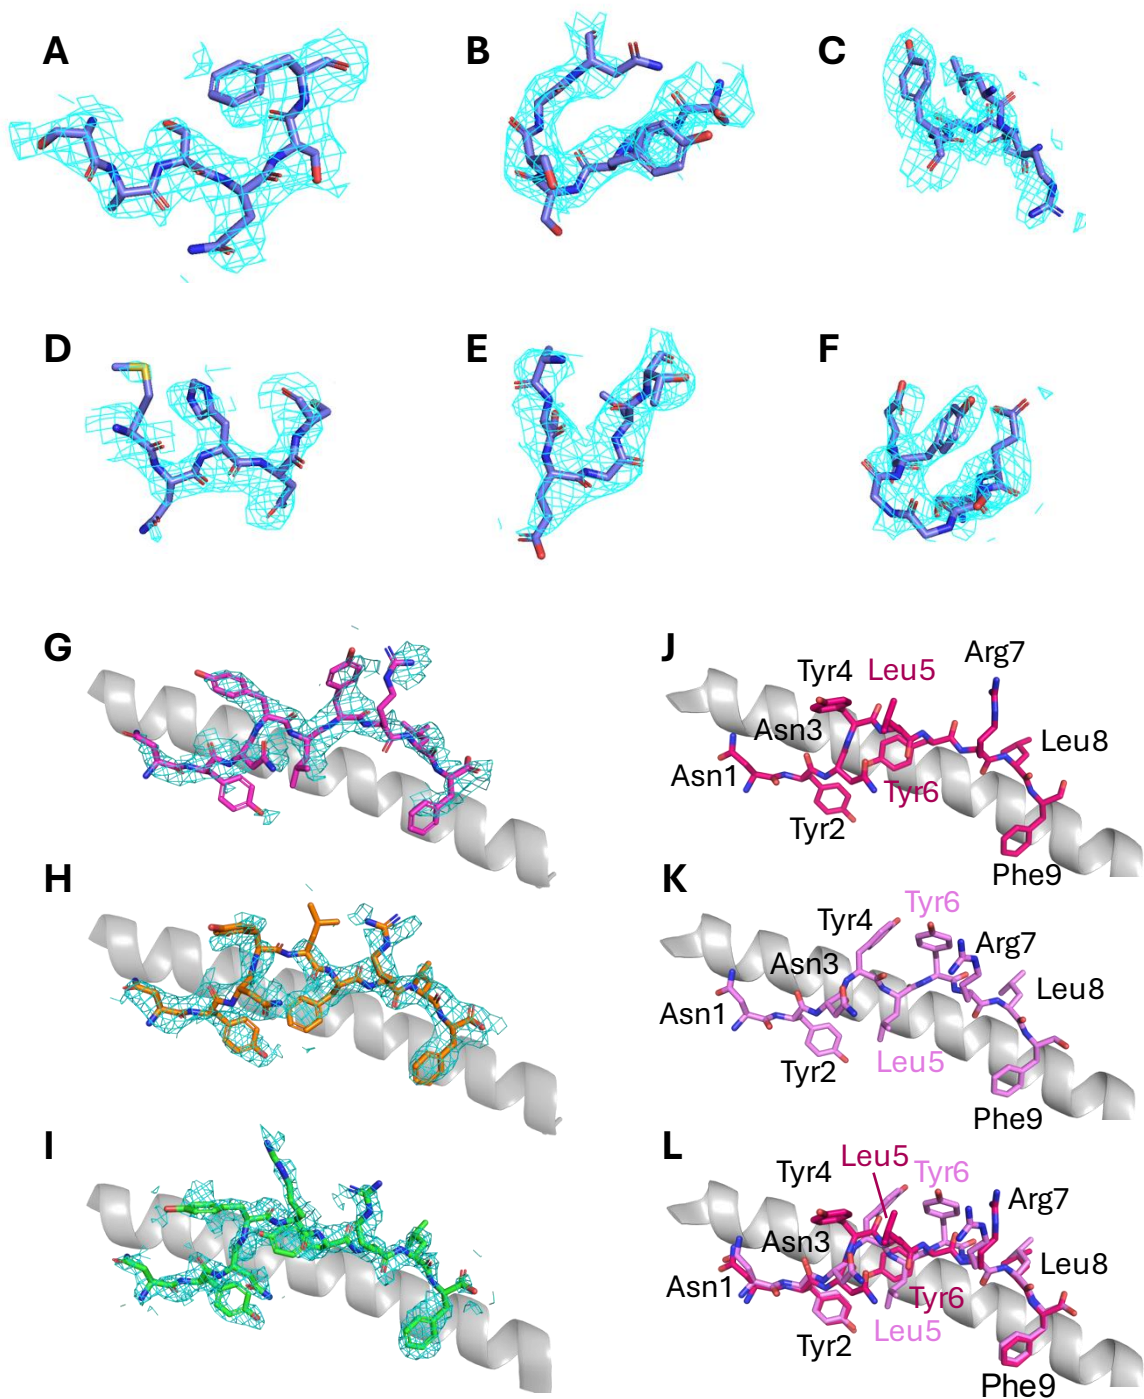

**Supplemental Figure S7. OMIT maps confirming robustness of X-ray crystallography models and Conformational change of the NF9 peptide and TCR cross-reactivity (A-F)**

3D structural maps of P1-15 Complementary Determining Regions (CDR) Loops (**A** – CDR1 $\alpha$ , **B** – CDR2 $\alpha$ , **C** – CDR3 $\alpha$ , **D** – CDR1 $\beta$ , **E** – CDR2 $\beta$ , **F** – CDR3 $\beta$ ) accompanied by their respective electron densities (cyan mesh). Unbiased omit maps were calculated after removal of the loops from the model to minimise model bias. (**G–I**) 3D structural maps of the NF9 peptide in complex with the P1-15 TCR (magenta sticks), NF9-6F peptide (orange sticks), and NF9-5R peptide (green sticks), accompanied by their respective electron densities (cyan mesh). Unbiased omit maps were calculated after removal of the peptide from the model to minimise model bias. The resulting electron density supports the assigned peptide backbone conformations and clearly resolves the distinct P5 and P6 orientations described in the main text. (**J**) Presentation of copy 1 of the NF9 peptide when not in complex with TCR, published by Zhang et al. (PDB 7F4W). (**K**) As in (A) but copy 2 published by Zhang et al. (PDB 7F4W). (**L**) Comparison of copy 1 and 2 from (A) and (B).

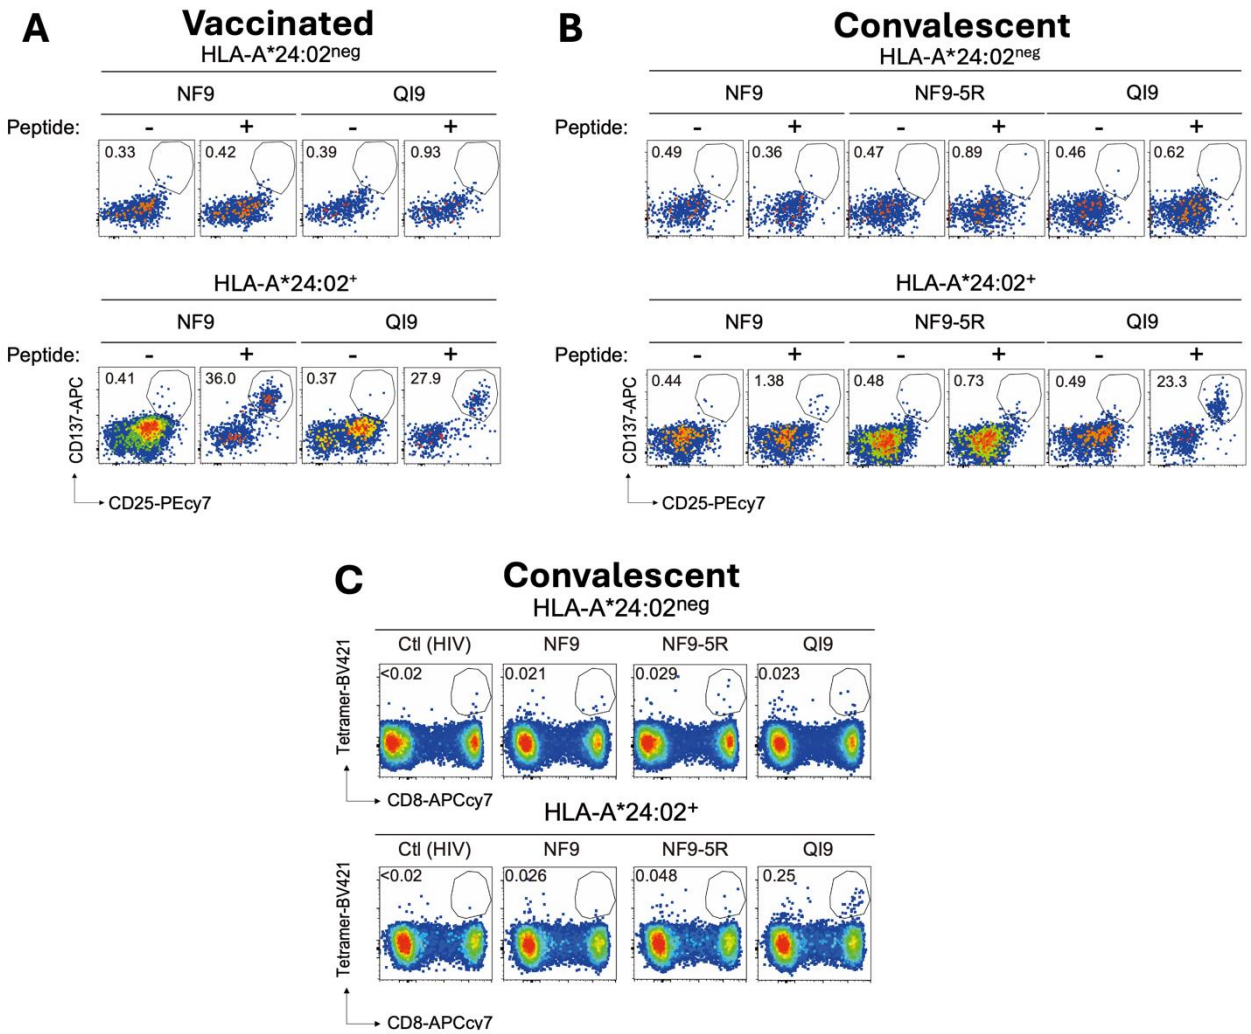

**Supplemental Figure S8. NF9 5R specific T-cells are not detectable in convalescent donors infected with the SARS-CoV-2 Delta variant: example flow cytometry plots. (A)** PBMCs from vaccinated donors stimulated with NF9 and QI9 peptides. Example flow cytometry plots shown for an HLA-A\*24:02<sup>neg</sup> or HLA-A\*24:02<sup>+</sup> donor. **(B)** PBMCs from convalescent donors infected with the delta strain. Example flow cytometry plots shown for an HLA-A\*24:02<sup>neg</sup> or HLA-A\*24:02<sup>+</sup> donor. **(C)** Tetramer staining of PBMCs from HLA-A\*24:02 negative (n = 6) or positive (n = 8) convalescent donors infected with the delta strain. Example flow cytometry plots shown for an HLA-A\*24:02<sup>neg</sup> or HLA-A\*24:02<sup>+</sup> donor.
